# Supplementary material
Source: PubMed Central journal article supplement (PMC6649234)

# Supporting Information

## for

### Water-Soluble Sulfonate Schiff-Base Ligands as Fluorescent Detectors for Metal Ions in Drinking Water and Biological Systems

Meredith J. Reimann<sup>†,‡</sup> Duncan R. Salmon,<sup>†,§</sup> Jacqueline T. Horton, Eric C. Gier and Latisha R. Jefferies\*

#### Table of Contents

|                                                                  |            |
|------------------------------------------------------------------|------------|
| <b>Figure S1: Tautomers Graphs – Polar Solvents.....</b>         | <b>S2</b>  |
| <b>Figure S2: Quenching Spectra – Metal ions.....</b>            | <b>S3</b>  |
| <b>Figure S3: Quenching Graphs – Counterions.....</b>            | <b>S11</b> |
| <b>Figure S4: Emission Spectra – Ionic Strength.....</b>         | <b>S12</b> |
| <b>Figure S5: Quenching Spectra – Ionic Strength.....</b>        | <b>S16</b> |
| <b>Figure S6: Quenching Spectrum – Competing Metal Ions.....</b> | <b>S16</b> |
| <b>Figure S7: Detection Limit Studies.....</b>                   | <b>S17</b> |
| <b>Figure S8: Tautomers Graphs – pH Studies.....</b>             | <b>S19</b> |
| <b>Figure S9: Quenching Graphs – pH Studies.....</b>             | <b>S20</b> |
| <b>Figure S10: NMRs.....</b>                                     | <b>S21</b> |

**Figure S2:** Absorbance spectrum of L<sub>1-4</sub> in different solvents.

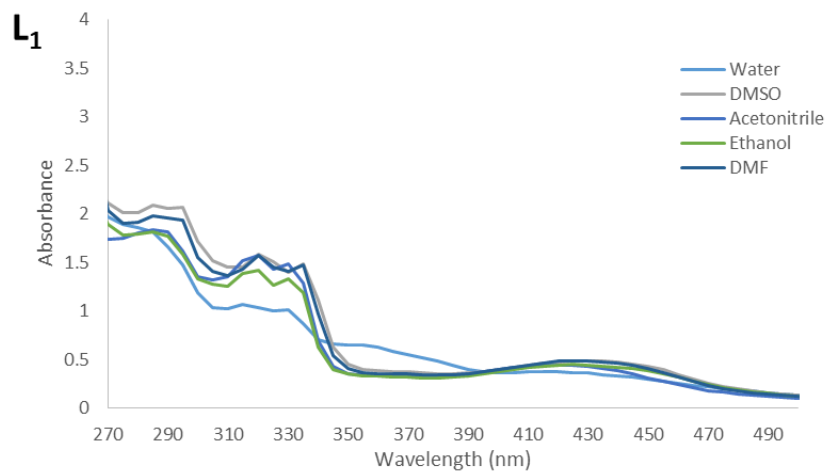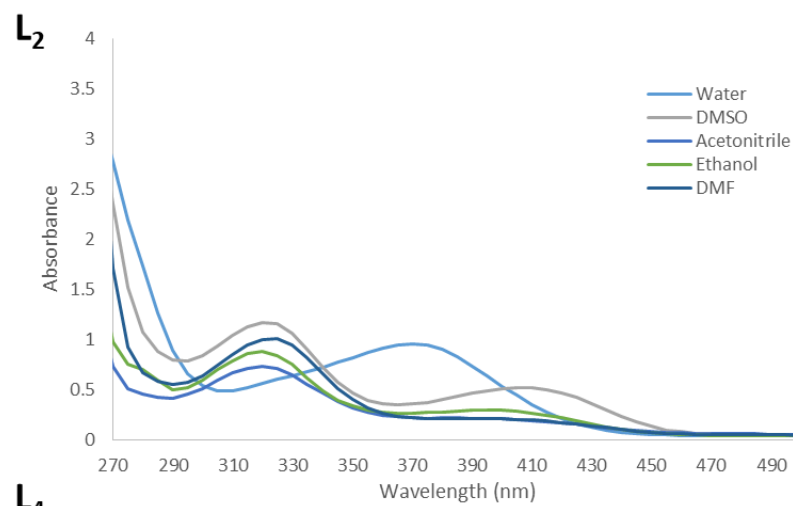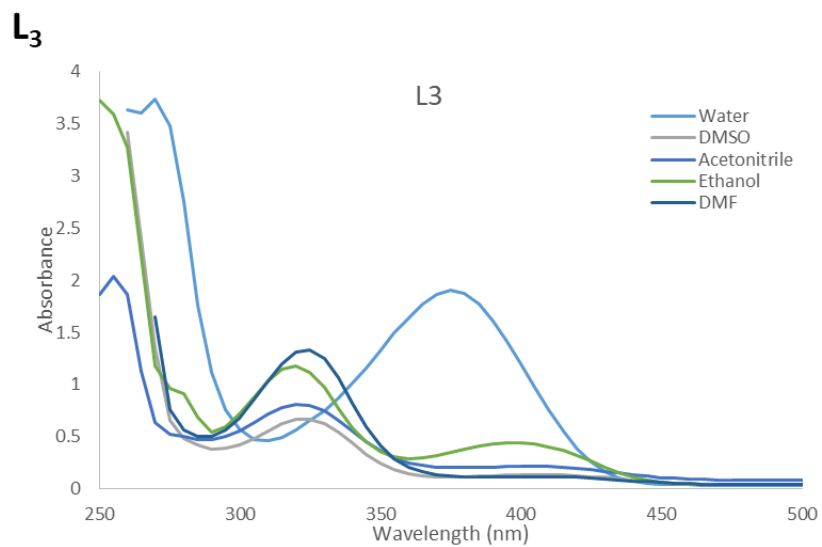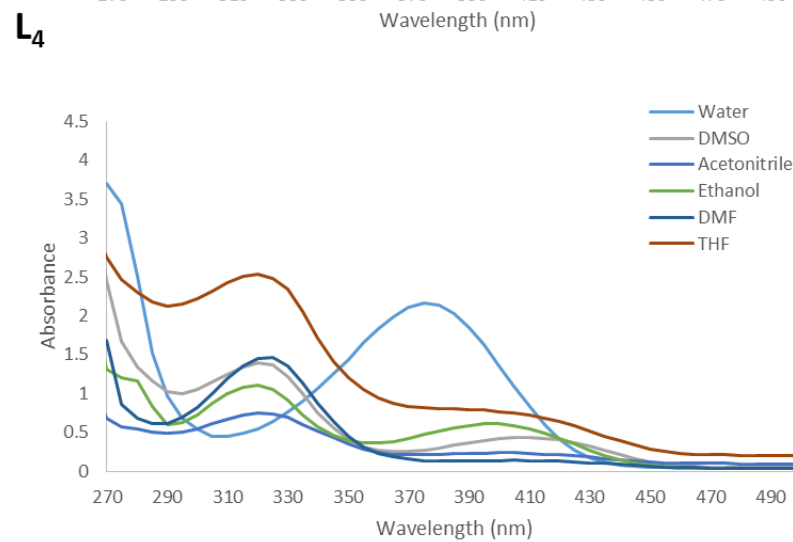

**Figure S2:** Fluorescence quenching spectra of L<sub>1</sub> (10 μM) and L<sub>2-4</sub> (1 mM) in deionized water upon addition of varying amounts of metal ions.

Quenching Spectrum for L<sub>1</sub>

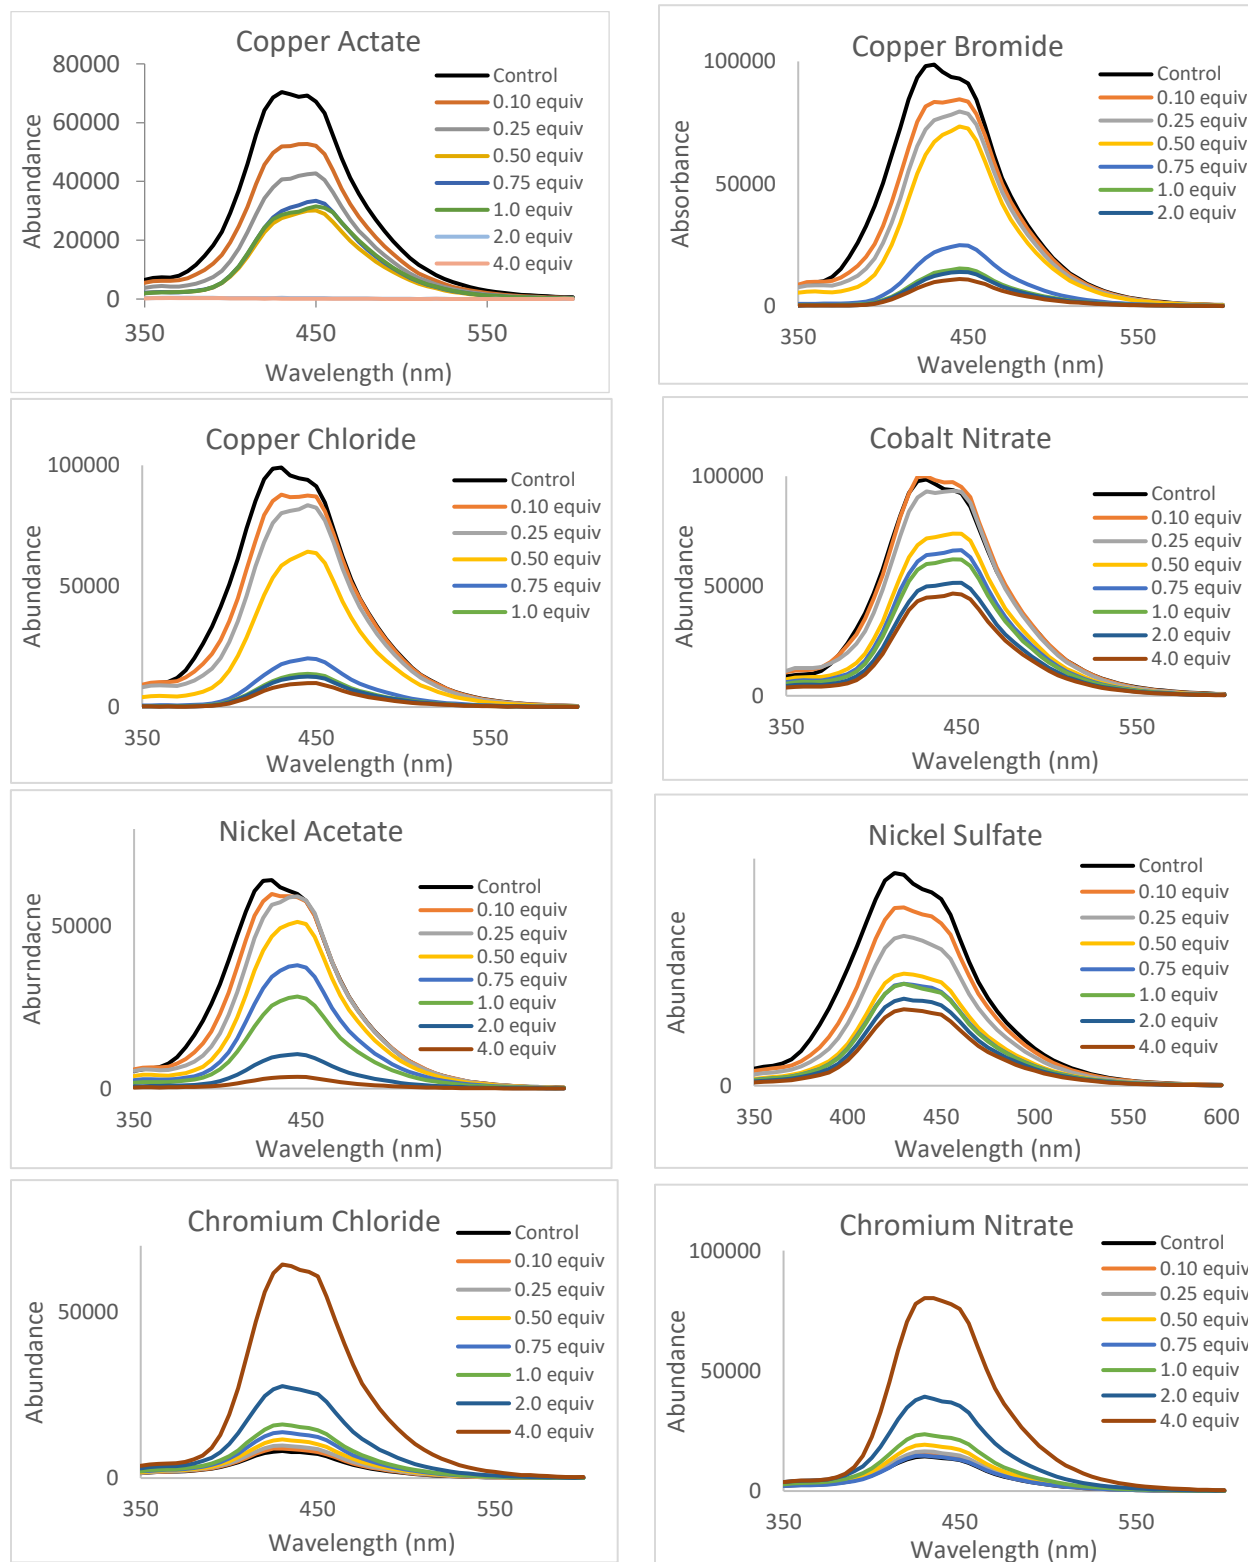

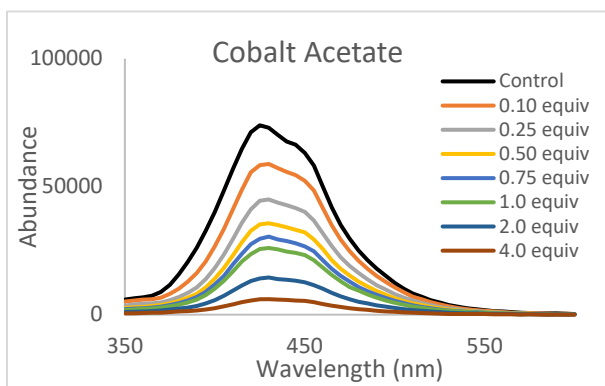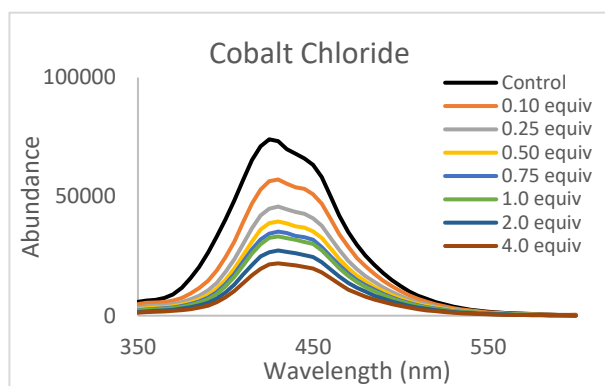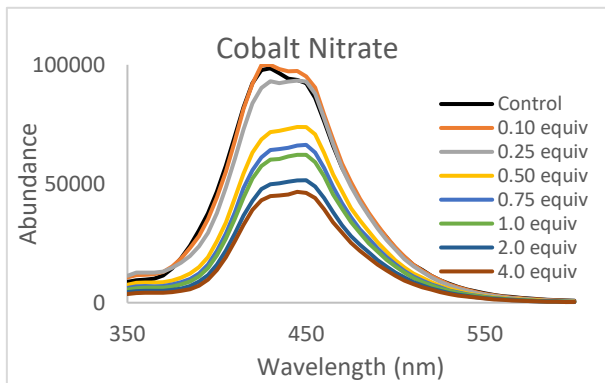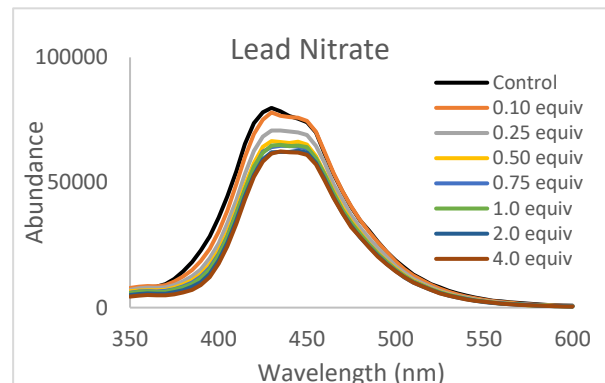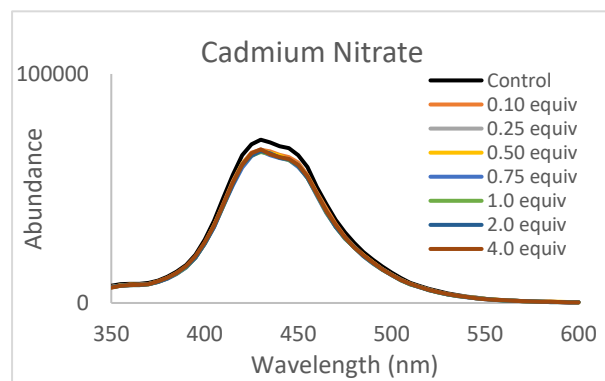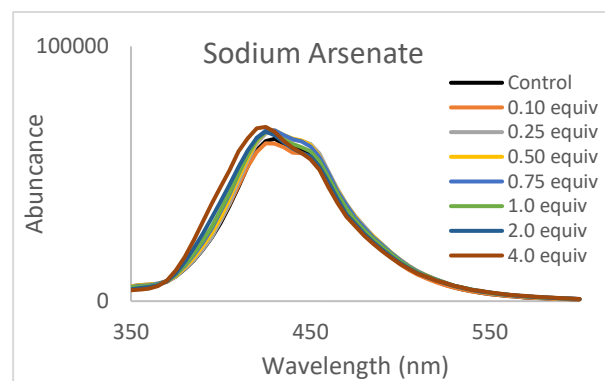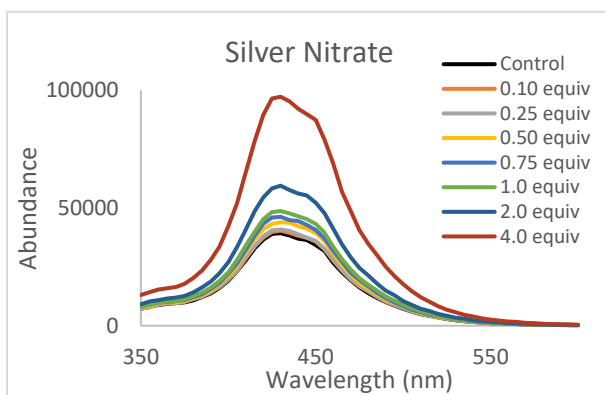

## Quenching Spectrum for L<sub>2</sub>

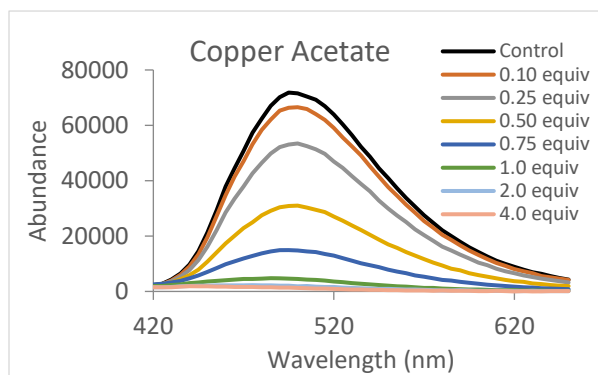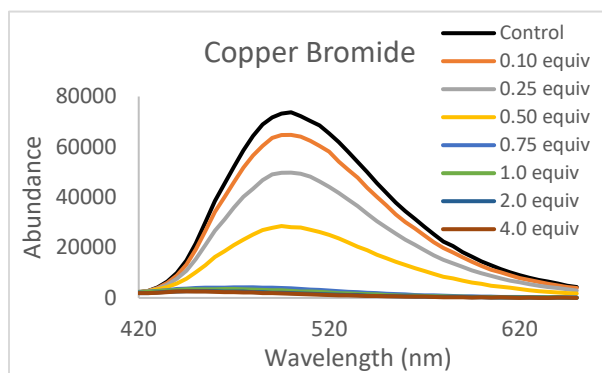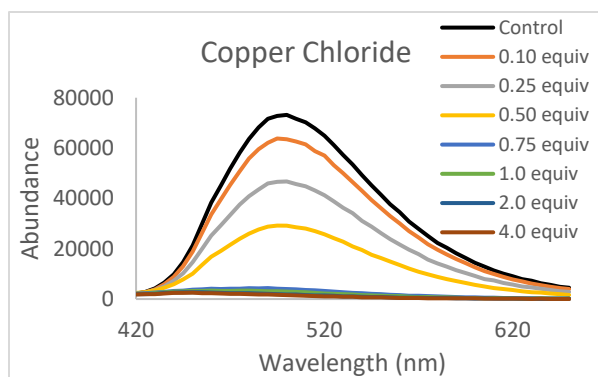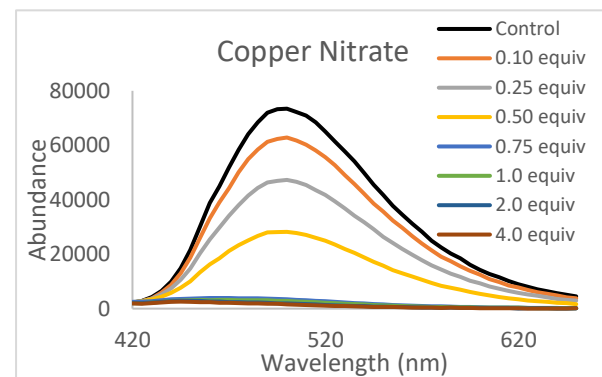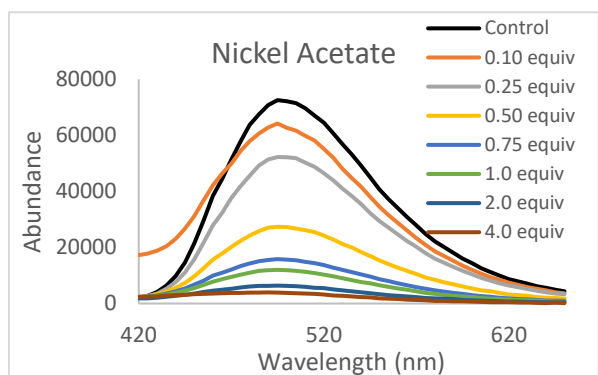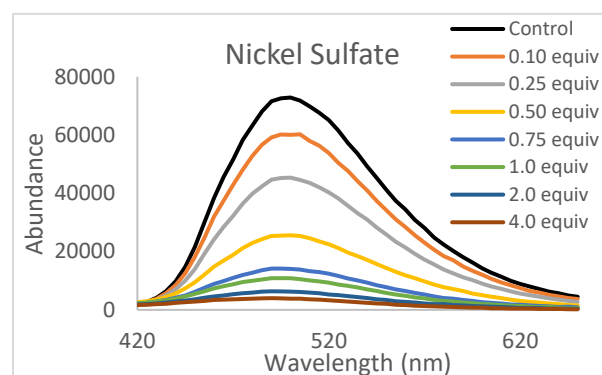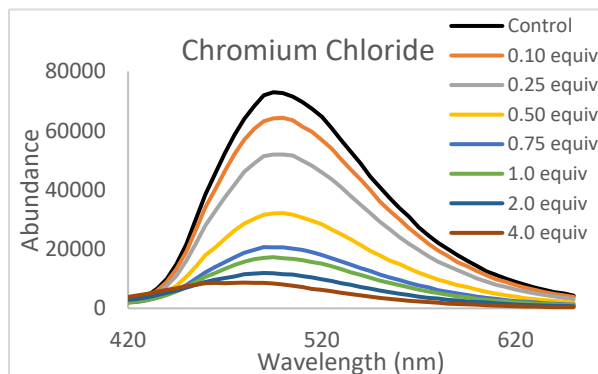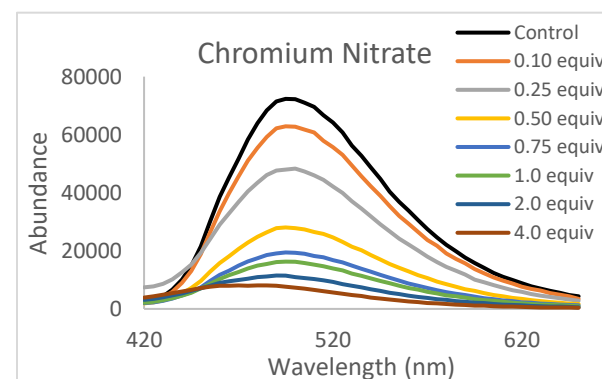

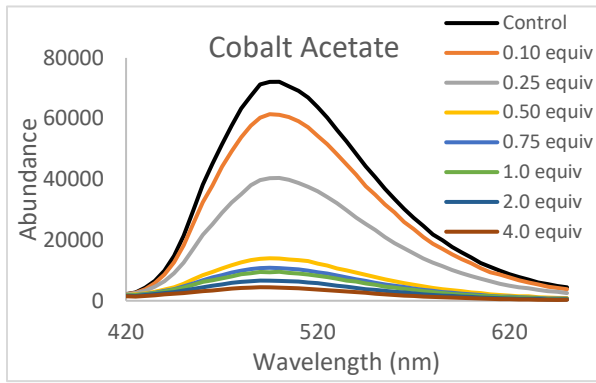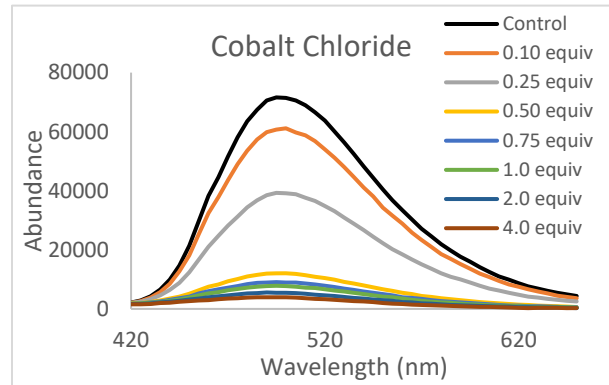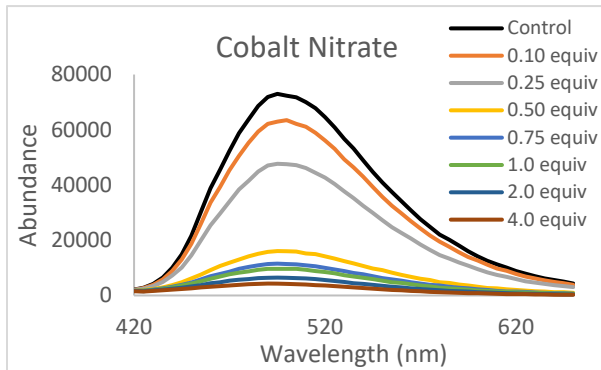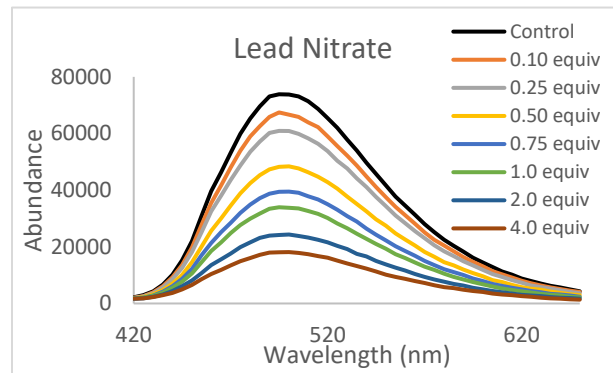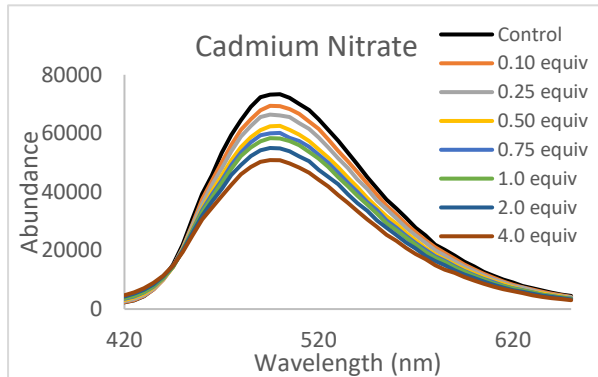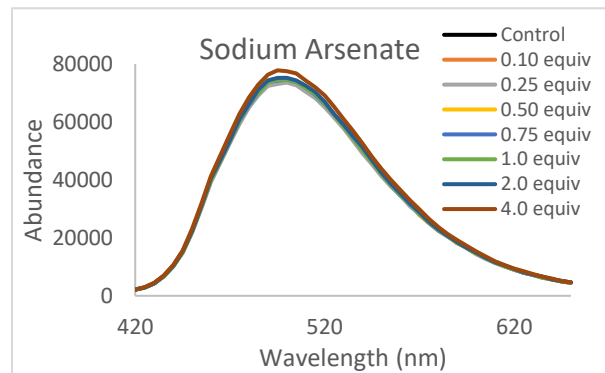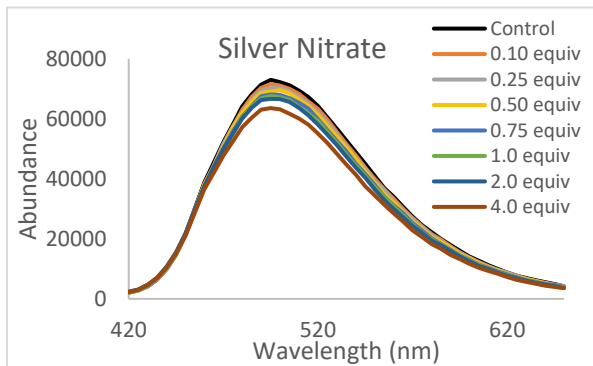

### Quenching Spectrum for L<sub>3</sub>

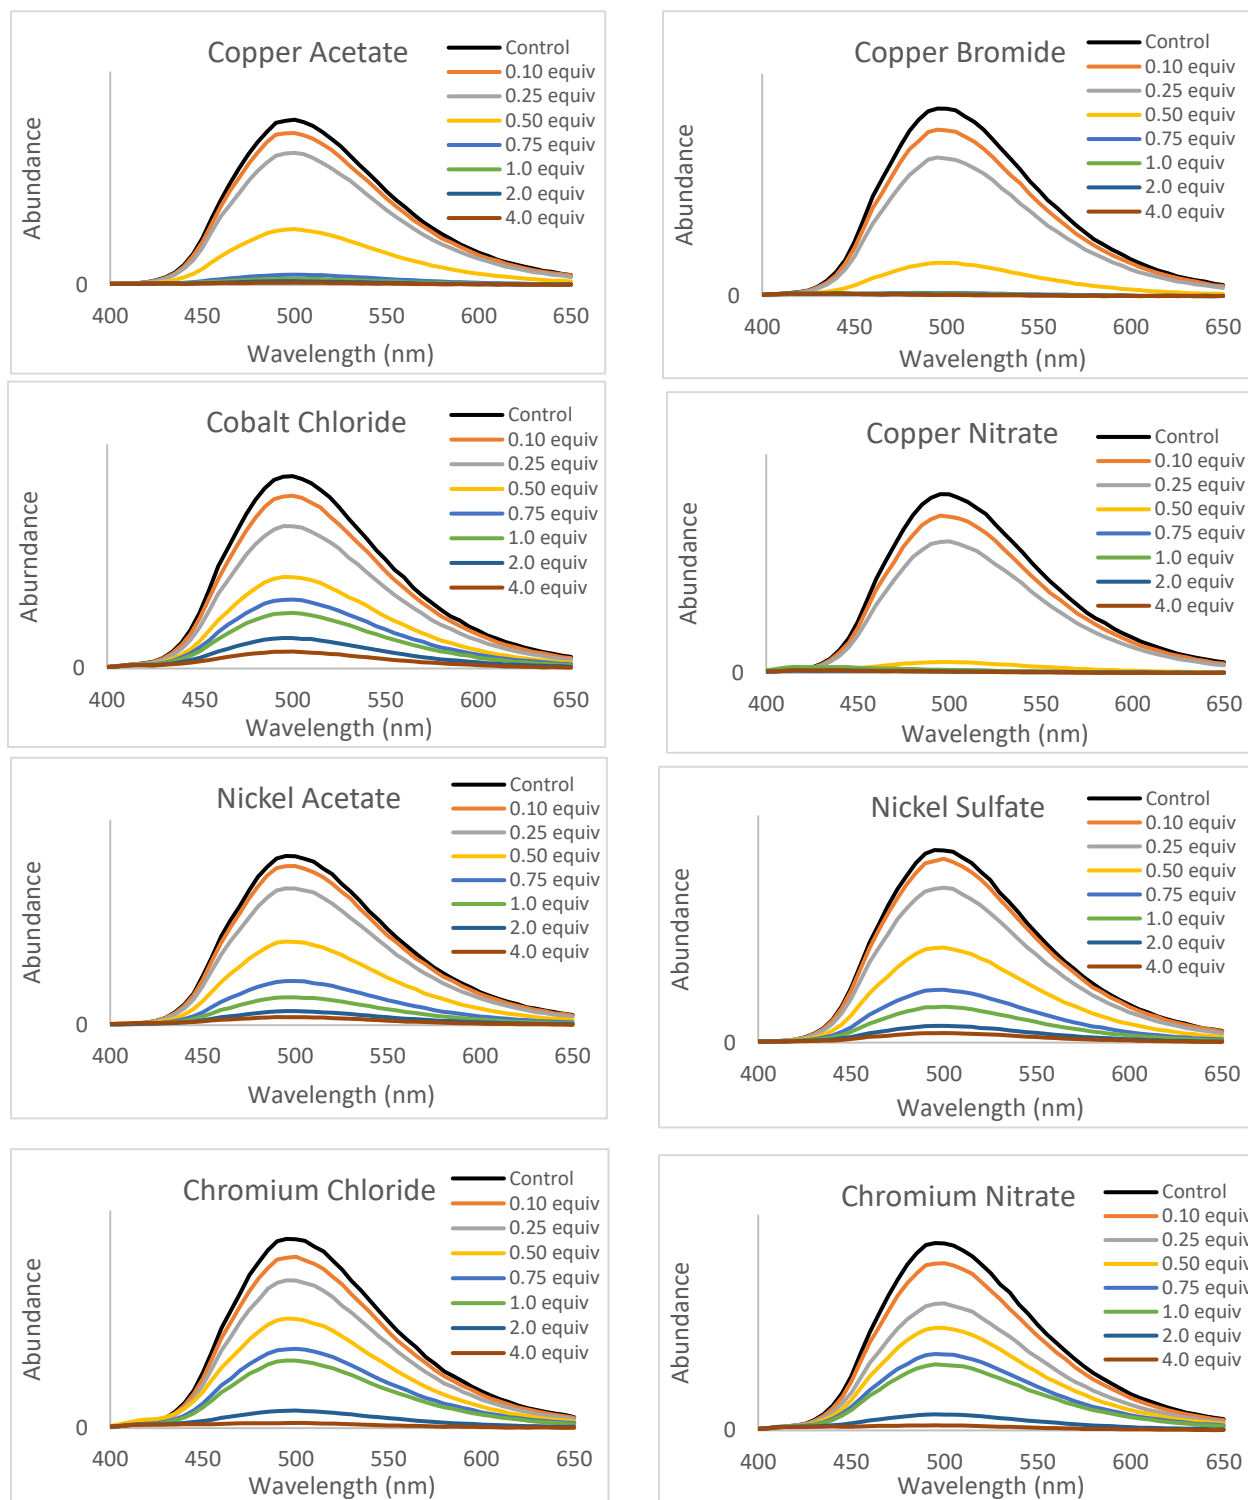

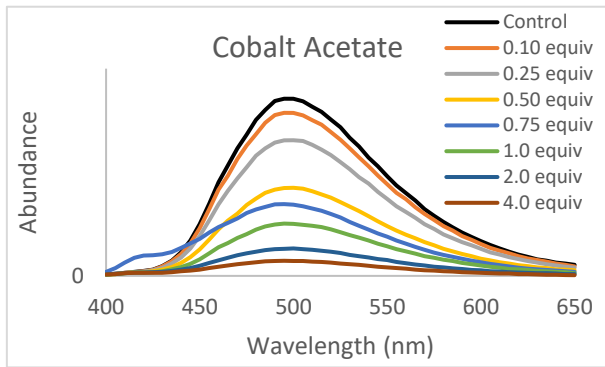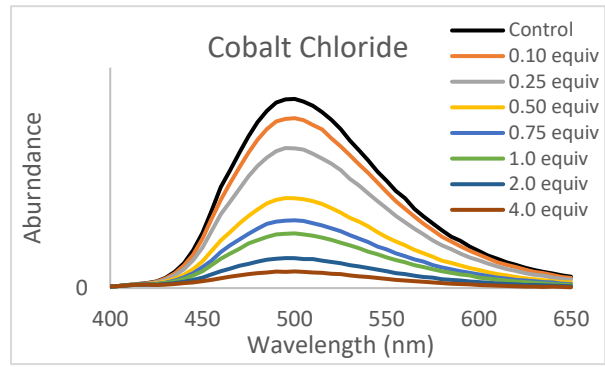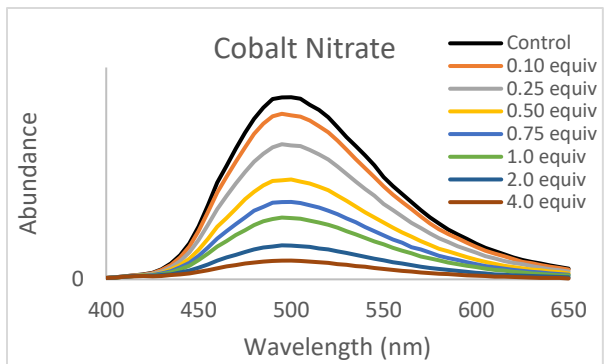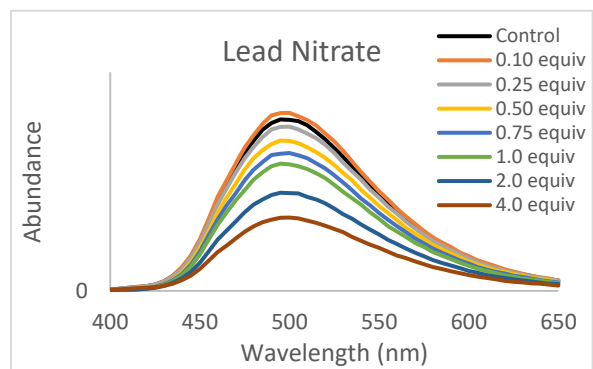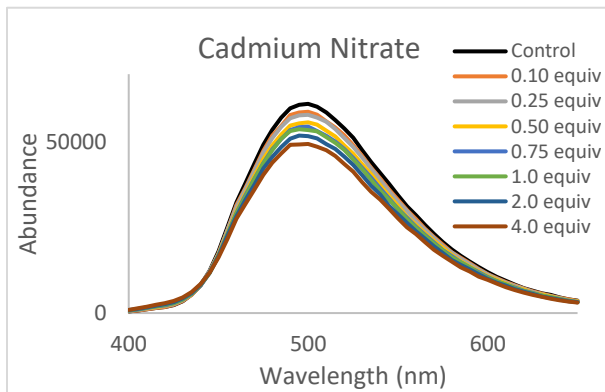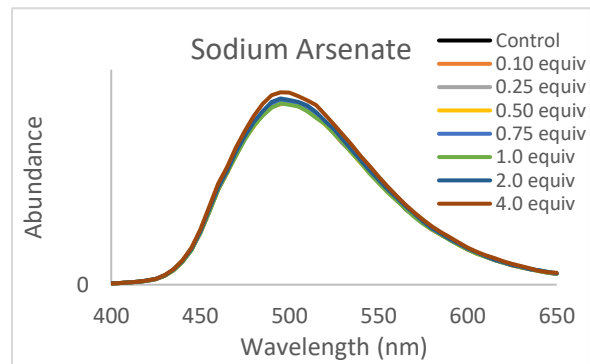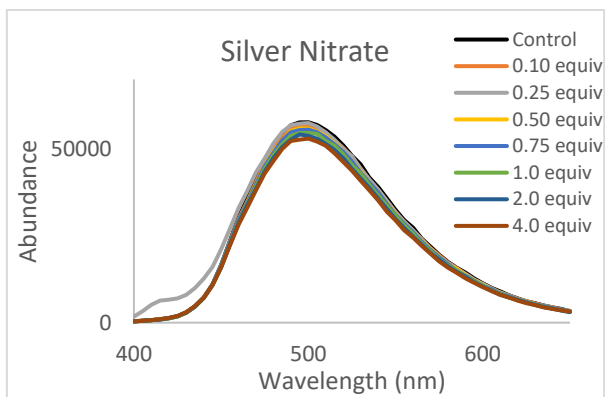



### Quenching Spectrum for L<sub>4</sub>

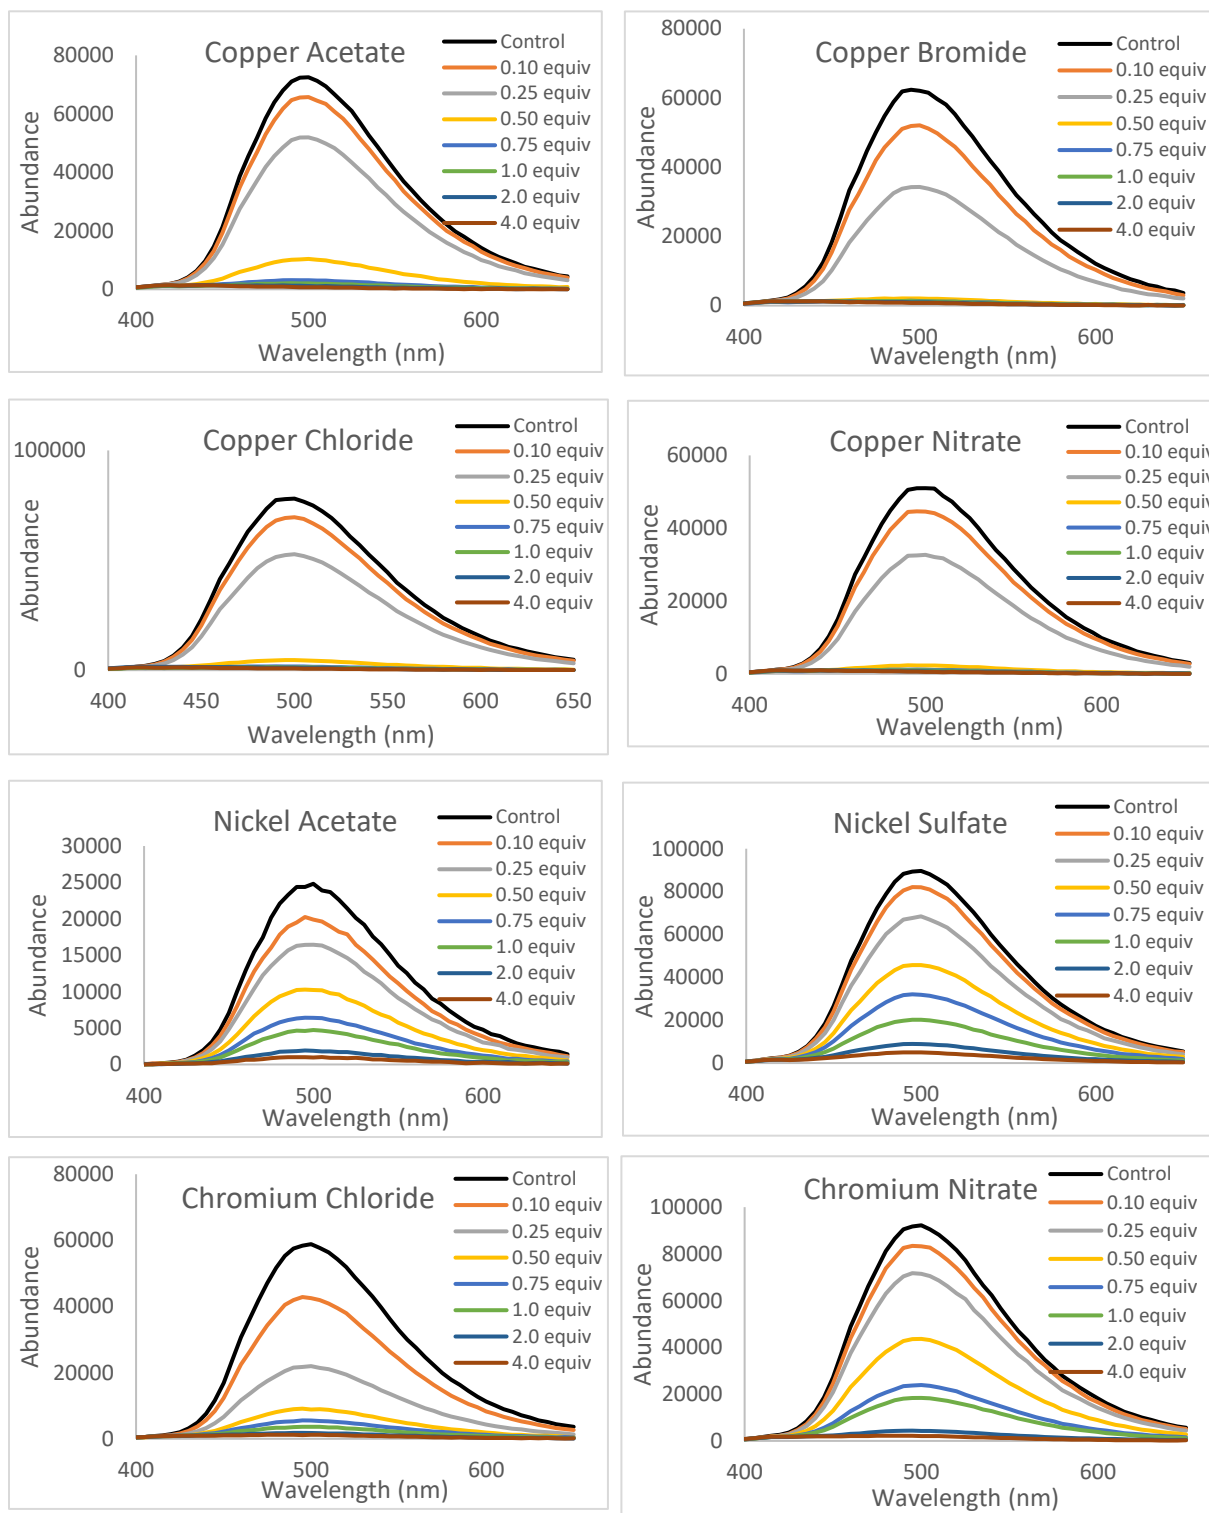

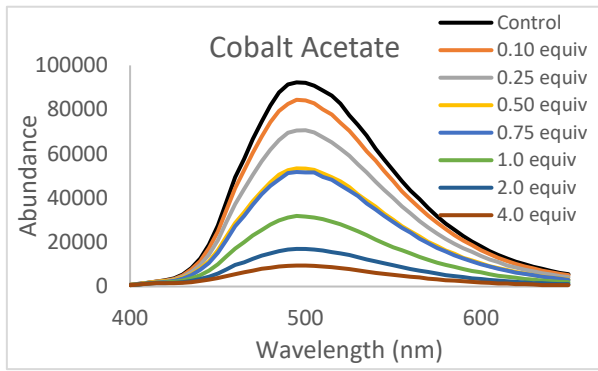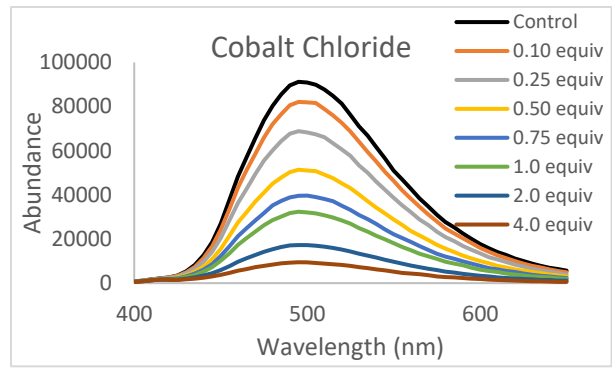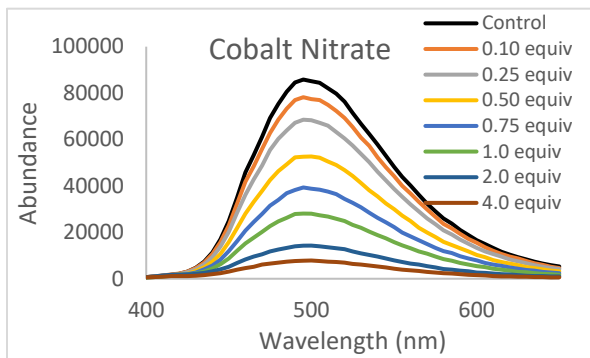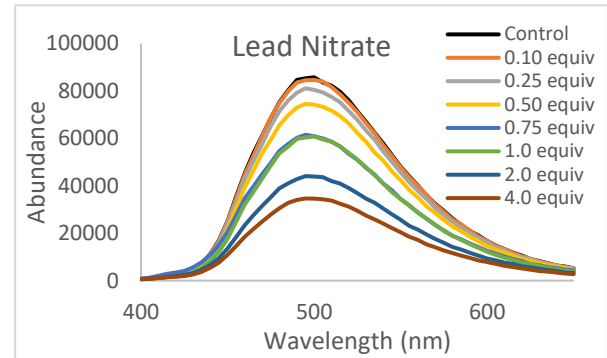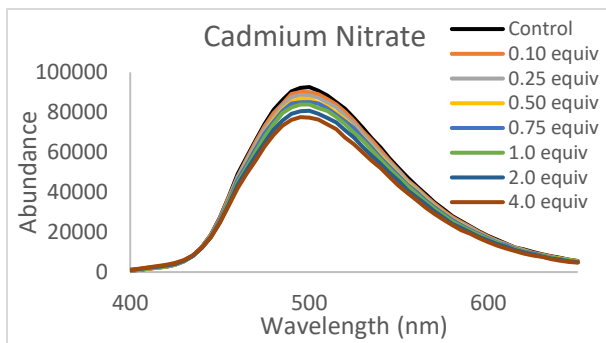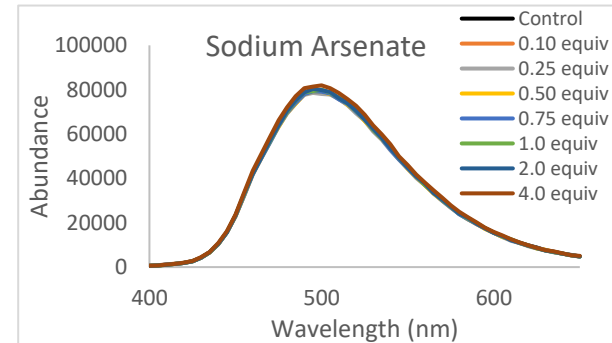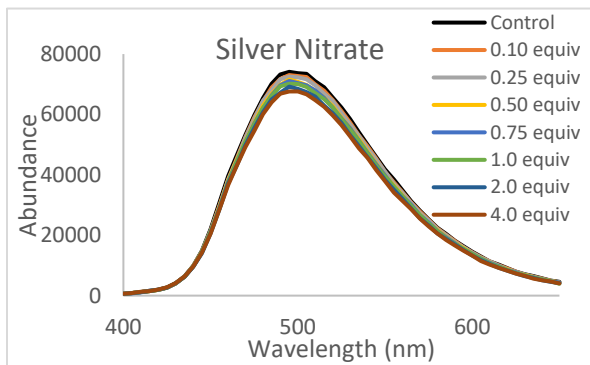

**Figure S3:** Fluorescence quenching graphs of  $L_1$  (10  $\mu$ M) and  $L_{2-4}$  (1 mM) in deionized water upon addition of 1.0 equiv. of varying counterions.

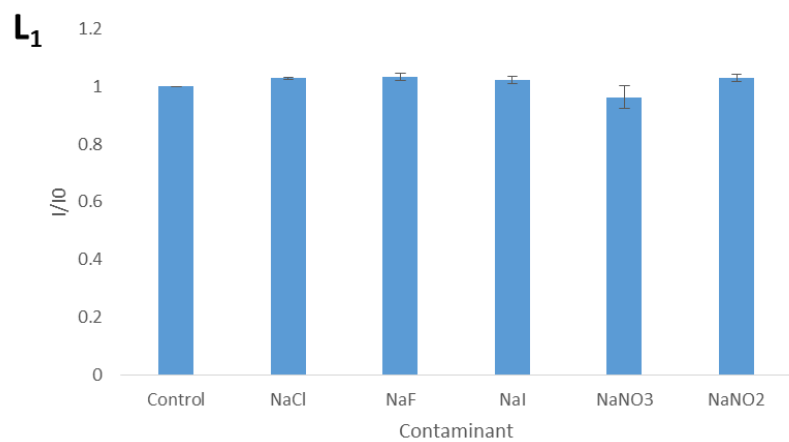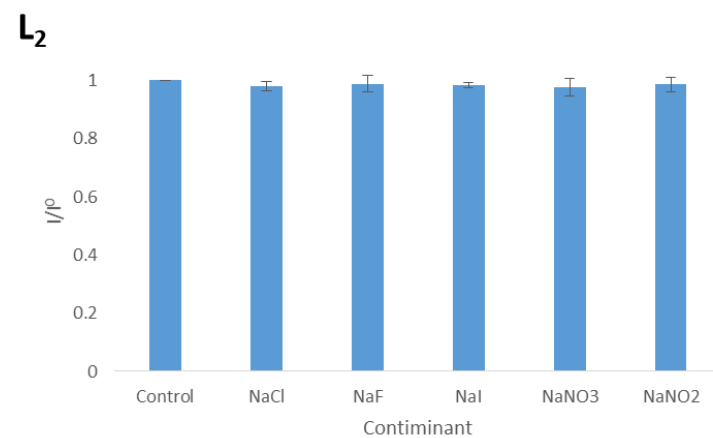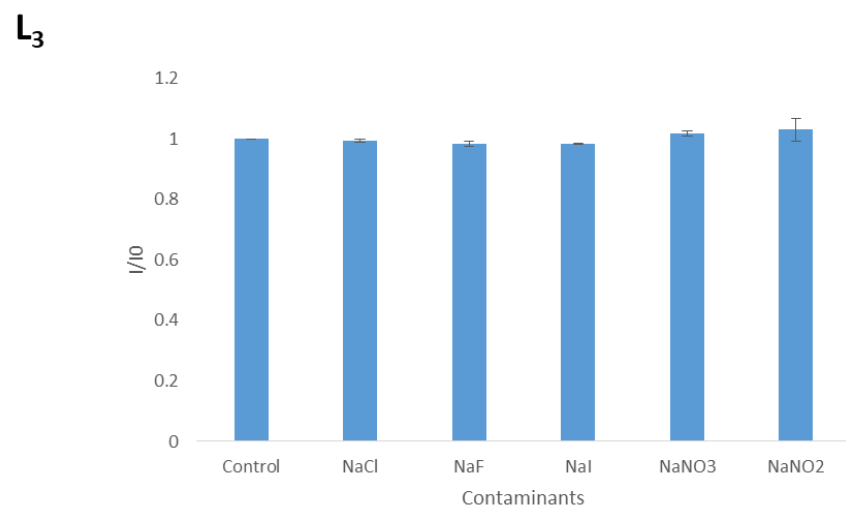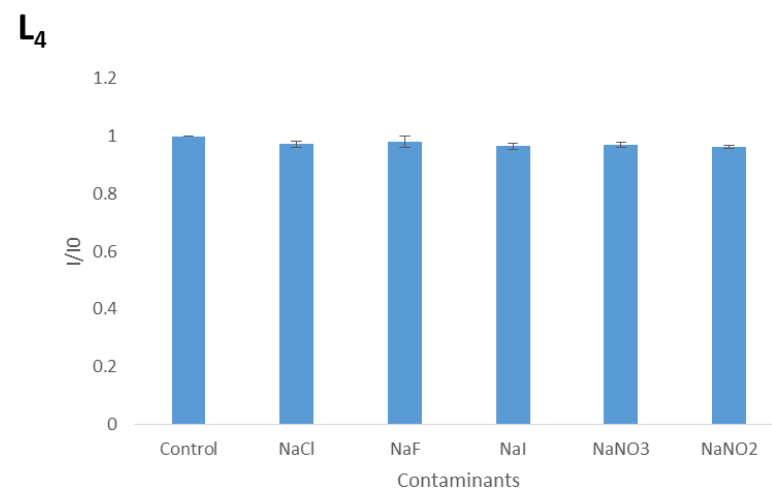

**Figure S4:** Ionic strength studies were performed with all L<sub>1</sub> (10 μM) and L<sub>2-4</sub> (1 mM) in the presence of 1000 mM, 100 mM, 10 mM and 1 mM solutions of NaCl, Na<sub>2</sub>SO<sub>4</sub>, MgCl<sub>2</sub> and MgSO<sub>4</sub>. For L<sub>1</sub>, salt concentrations at 1000 mM were not reproducible and thus omitted from the spectrum.

### Sodium Chloride

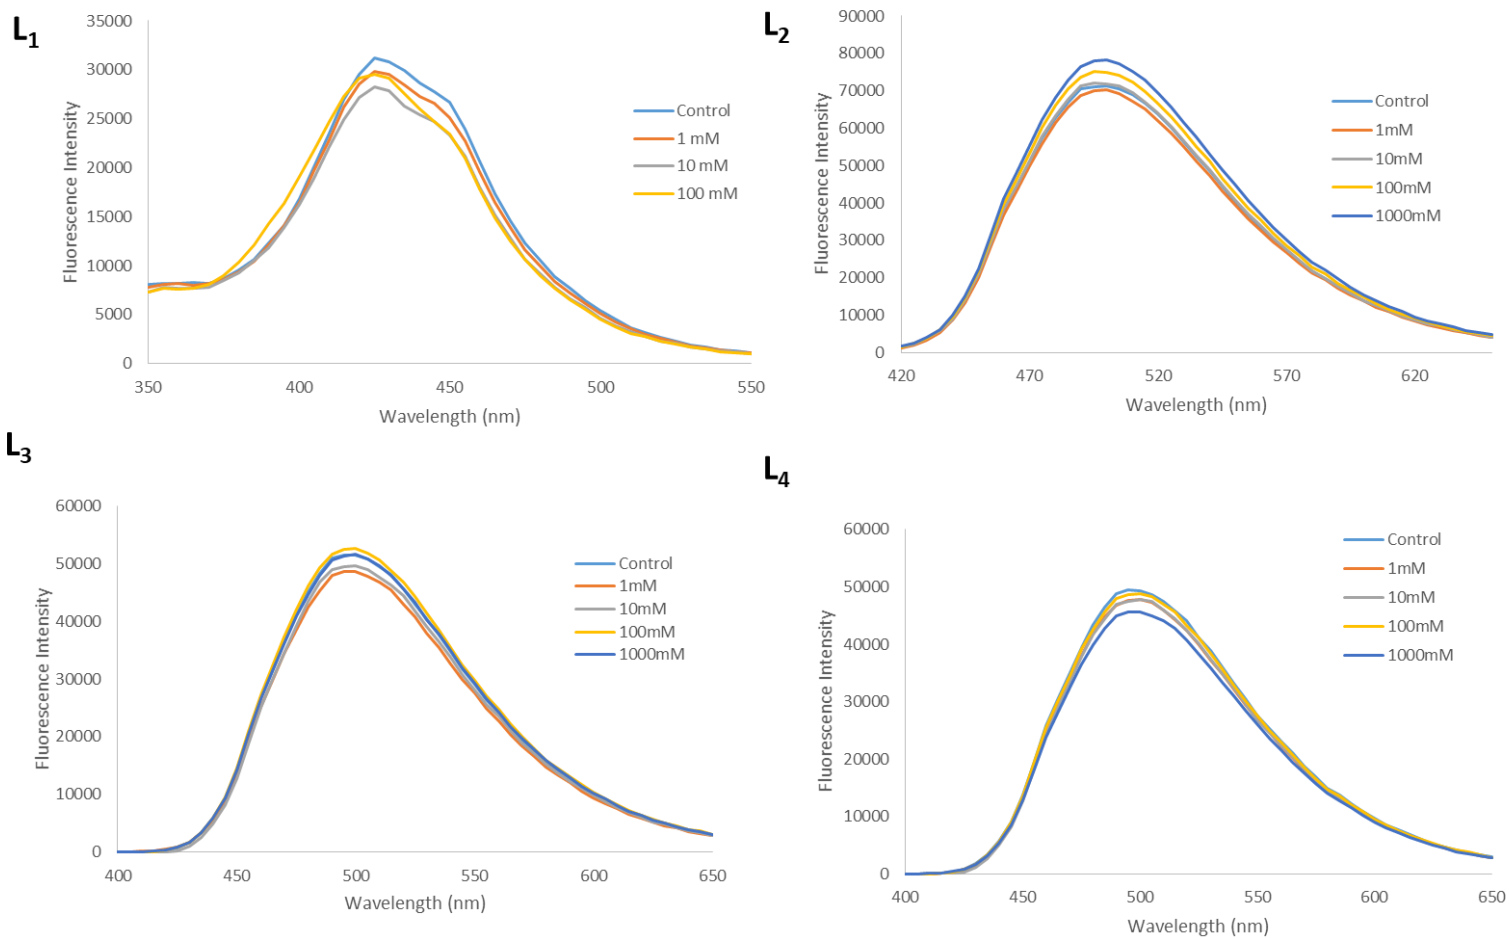

## Sodium Sulfate

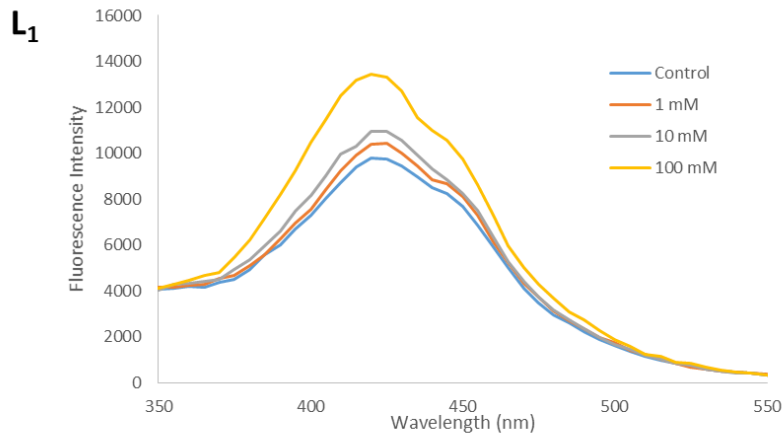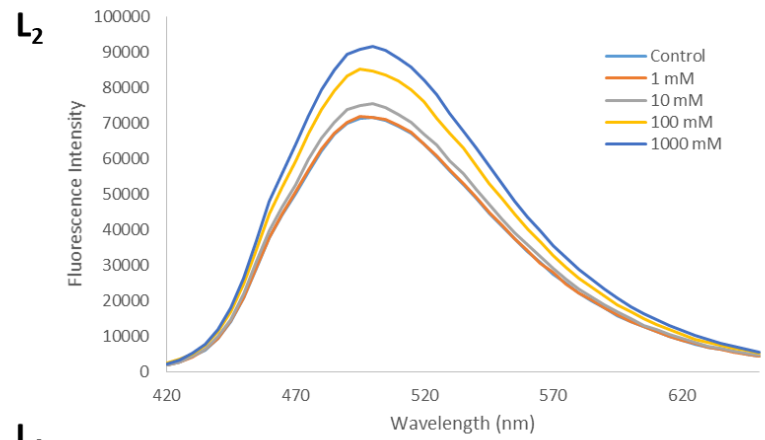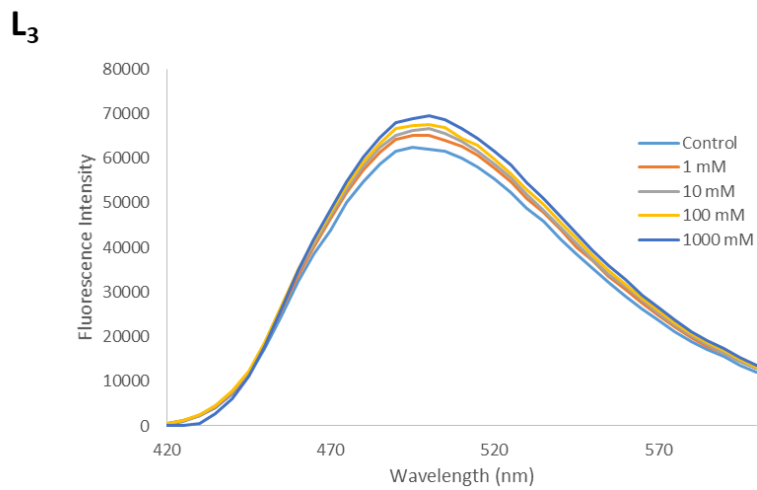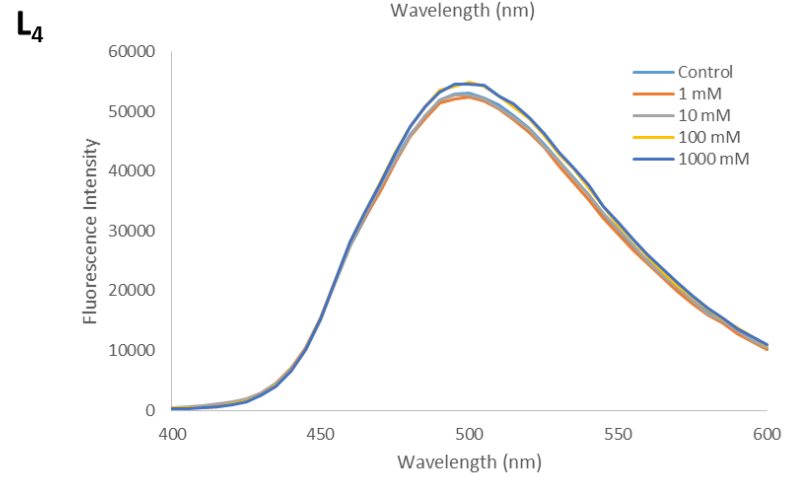

## Magnesium Chloride

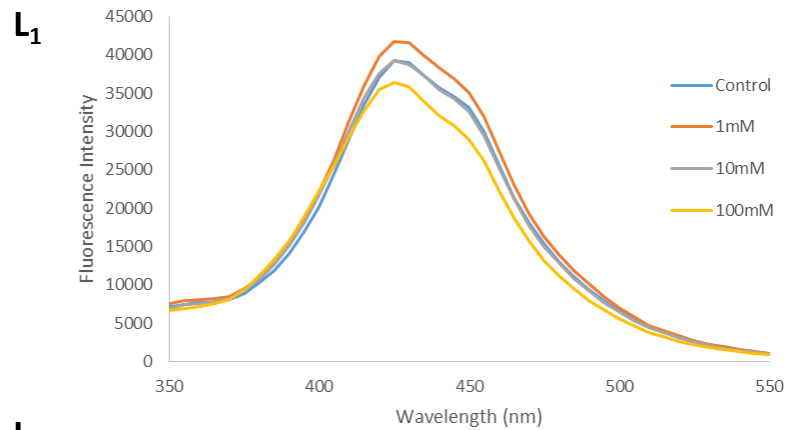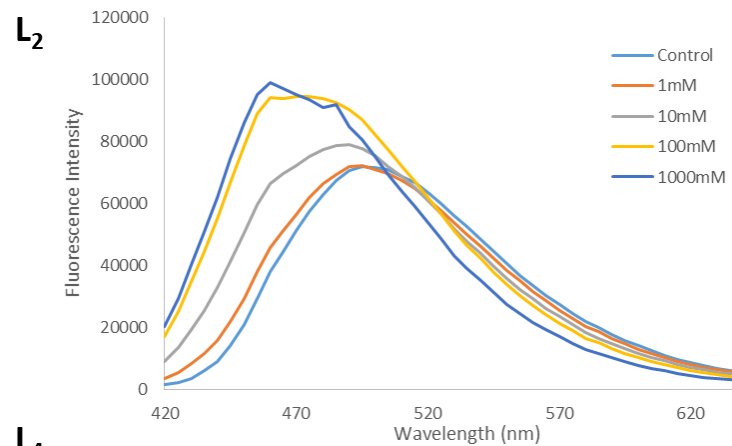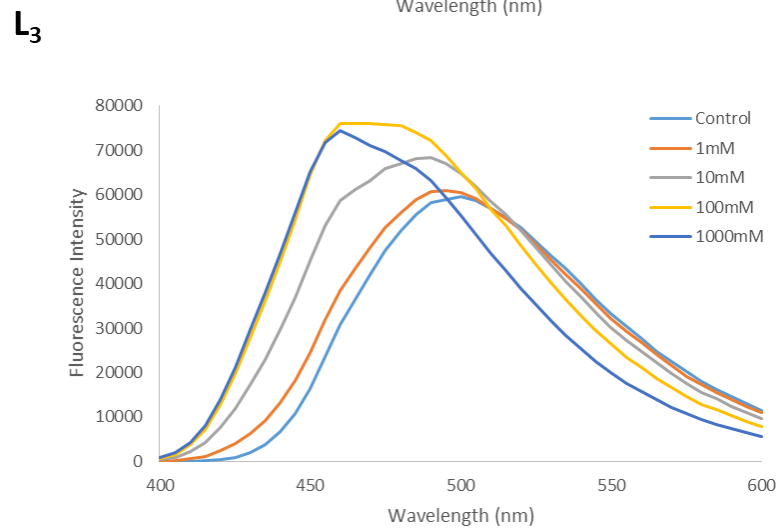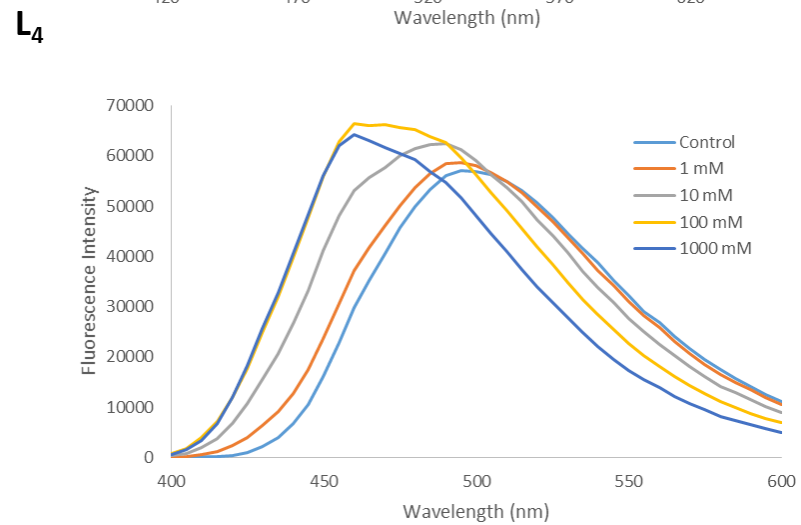

# Magnesium Sulfate

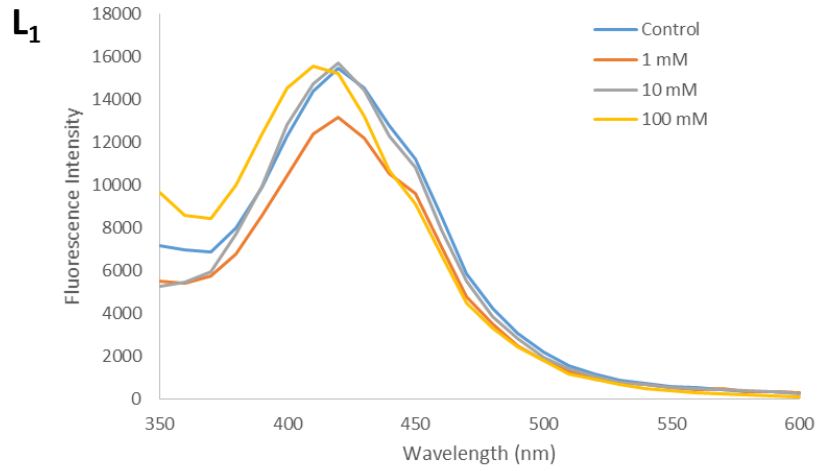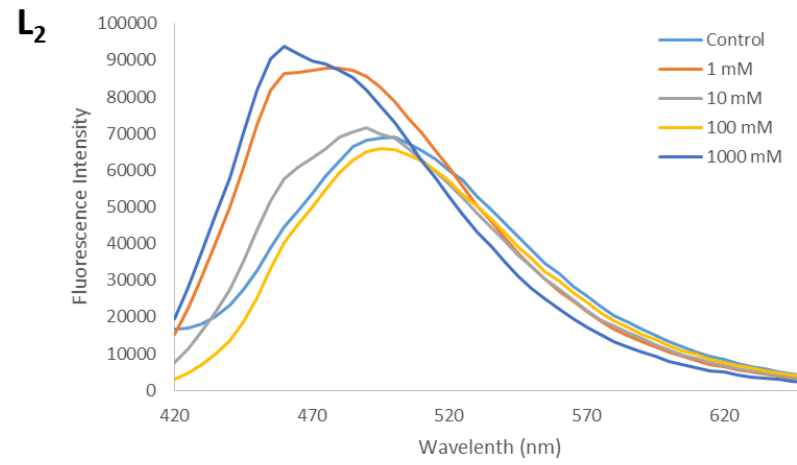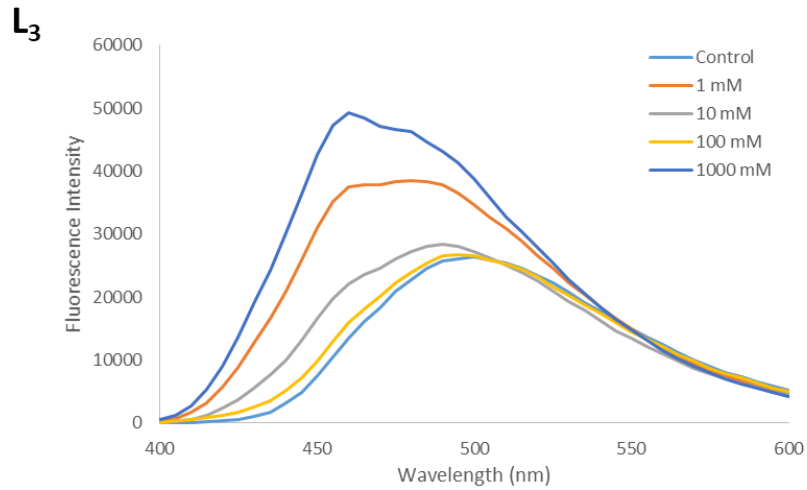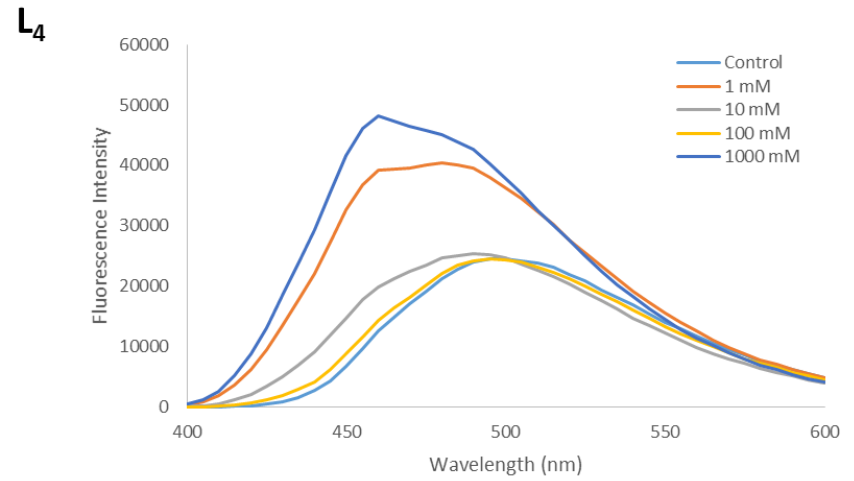

**Figure S5:** Quenching spectra of  $L_2$  (1mM) with increasing equivalence of  $Cu^{2+}$  in the a) presence of 1000 mM  $MgSO_4$  and b) in the absence of 1000 mM  $MgSO_4$ .

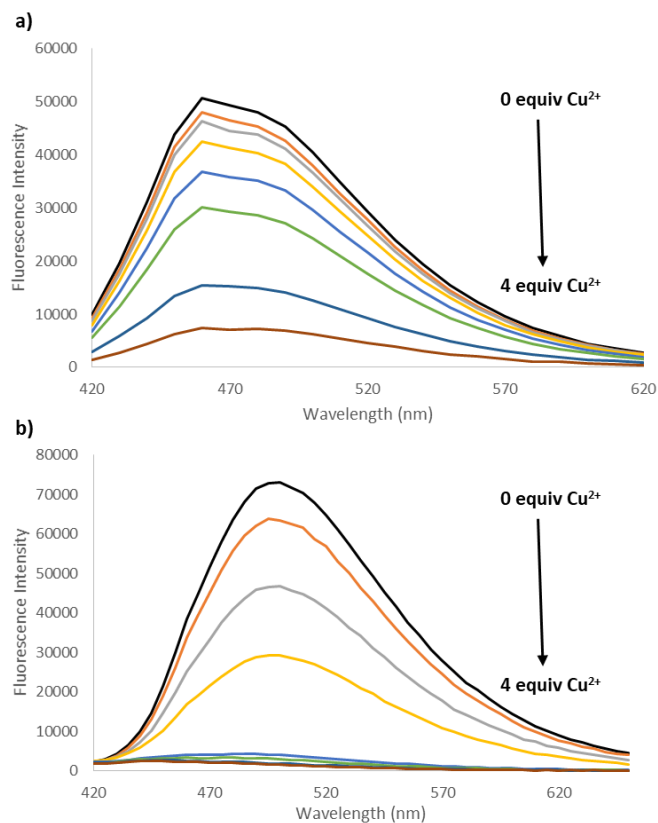

**Figure S6:** Competing metal ions  $Cu^{2+}$  and  $Cr^{3+}$  with  $L_1$ . The spectrum shows  $L_1$  in the absence and presence of 1 equivalent of  $Cu^{2+}$ , 1 equivalent of  $Cr^{3+}$  and 1 equivalent of  $Cu^{2+}$  and  $Cr^{3+}$ . UV-vis and daylight photos of the compounds are shown.

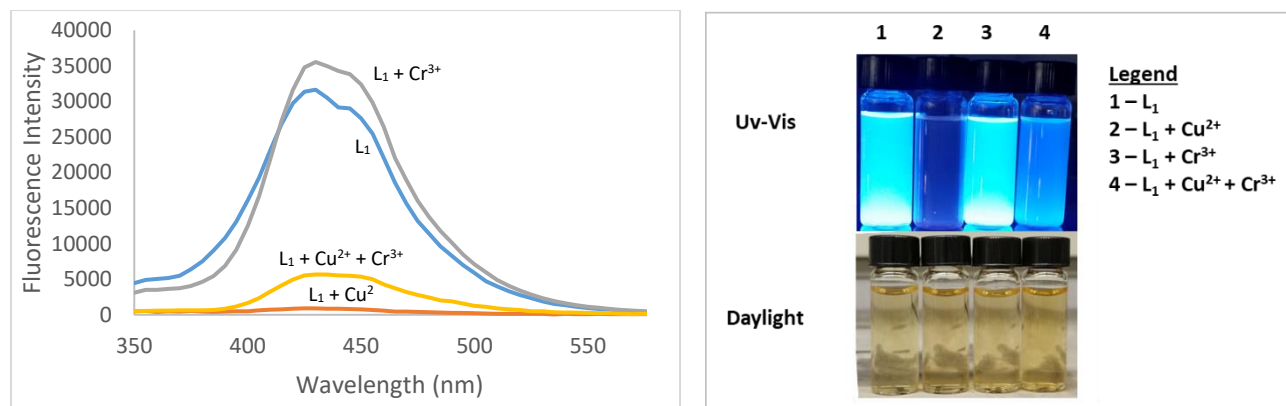



**Figure S7:** Detection Limit of L<sub>1</sub>-L<sub>4</sub>. L<sub>1</sub> was excited at 300 nm, L<sub>2</sub> was excited at 380 nm and L<sub>3</sub> and L<sub>4</sub> were excited at 375 nm.

L<sub>1</sub>

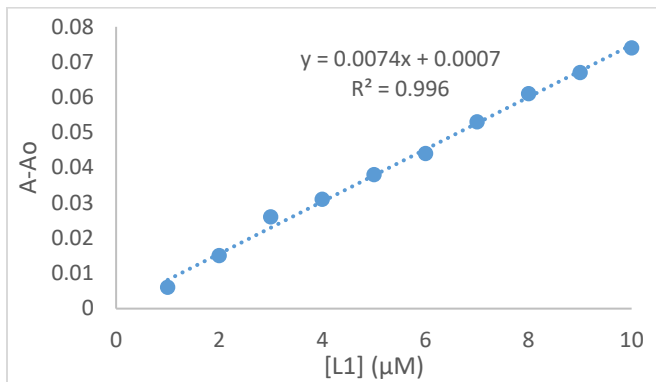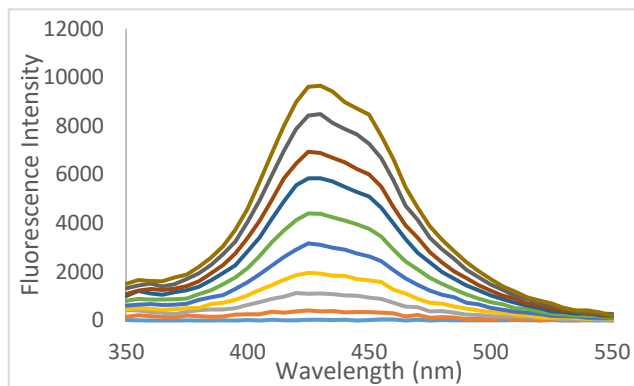

L<sub>2</sub>

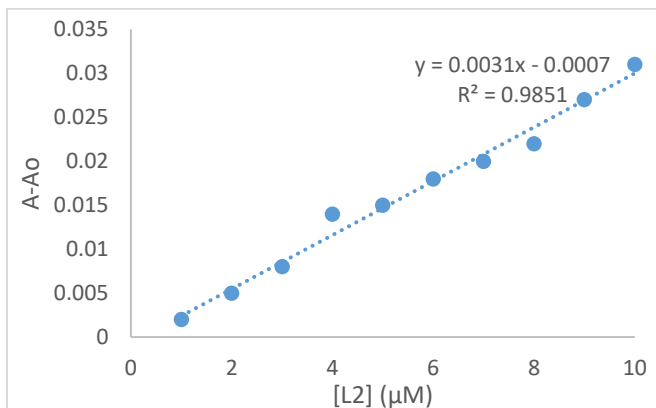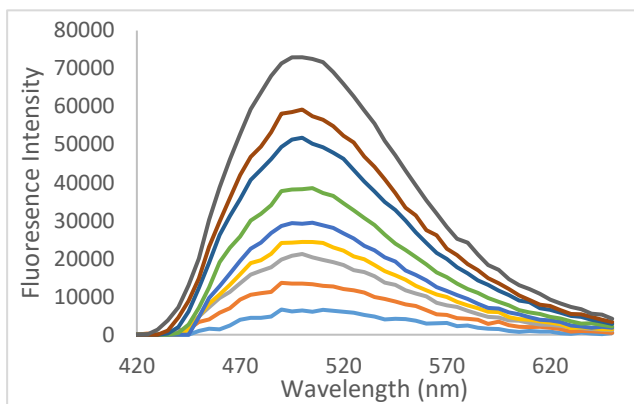

L<sub>3</sub>

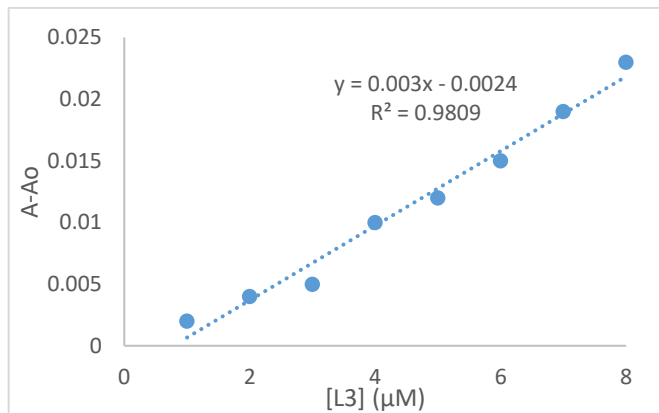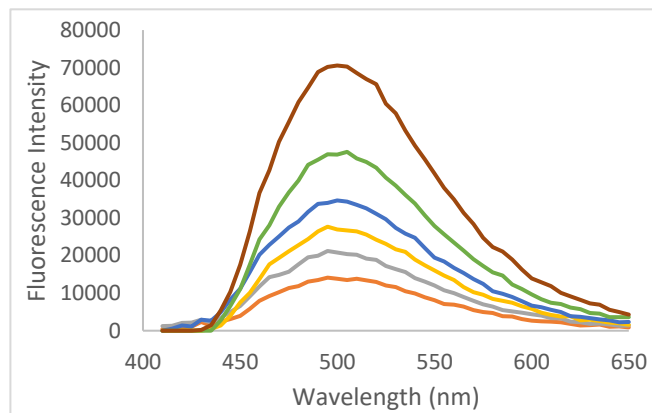

L4

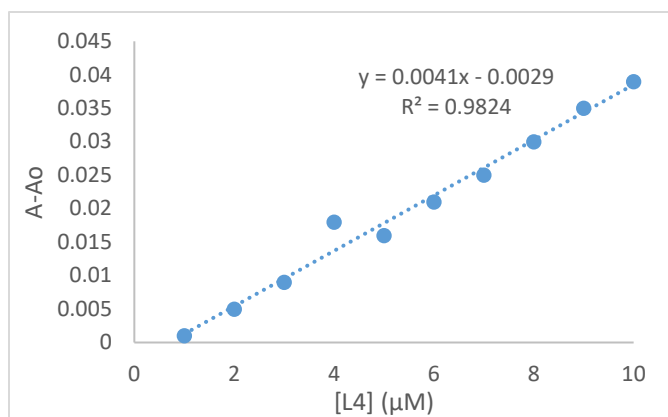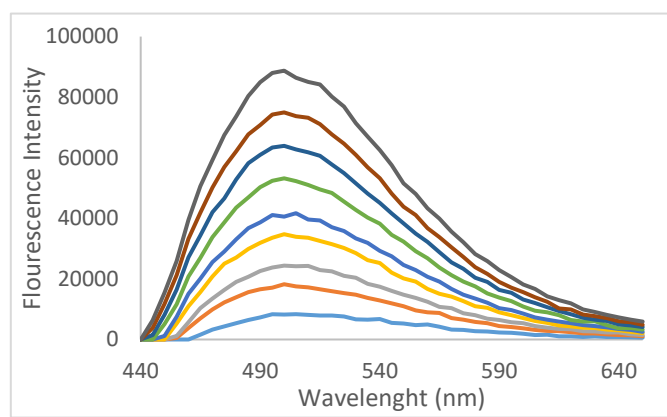

**Figure S8:** Absorbance spectrum of L<sub>1-4</sub> at different pH in 10 mM KH<sub>2</sub>PO<sub>4</sub> buffer.

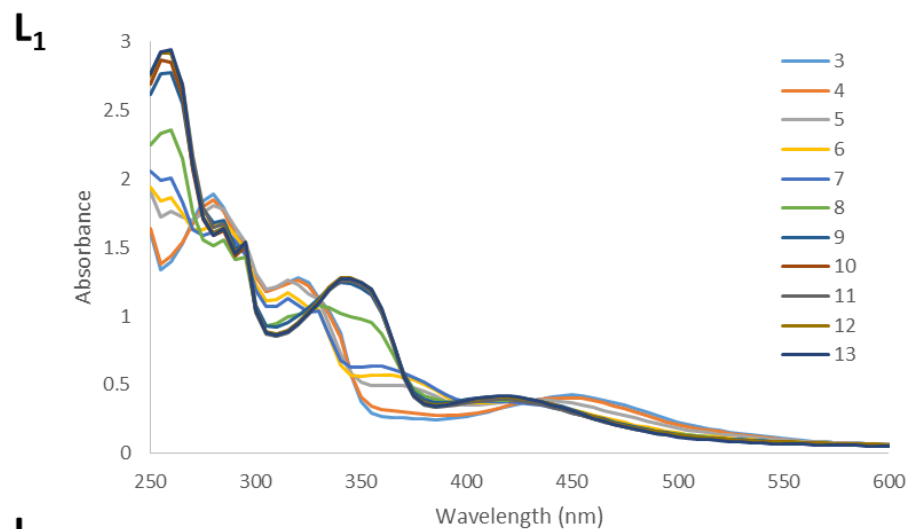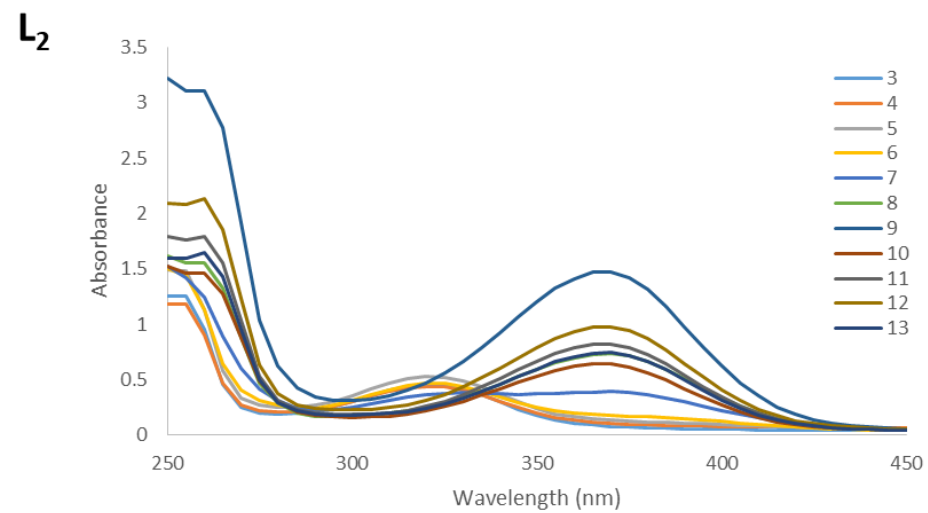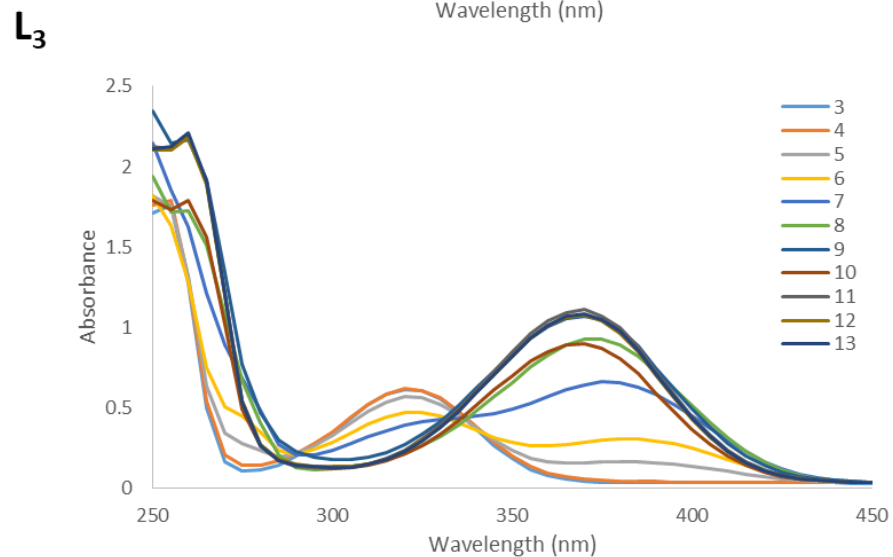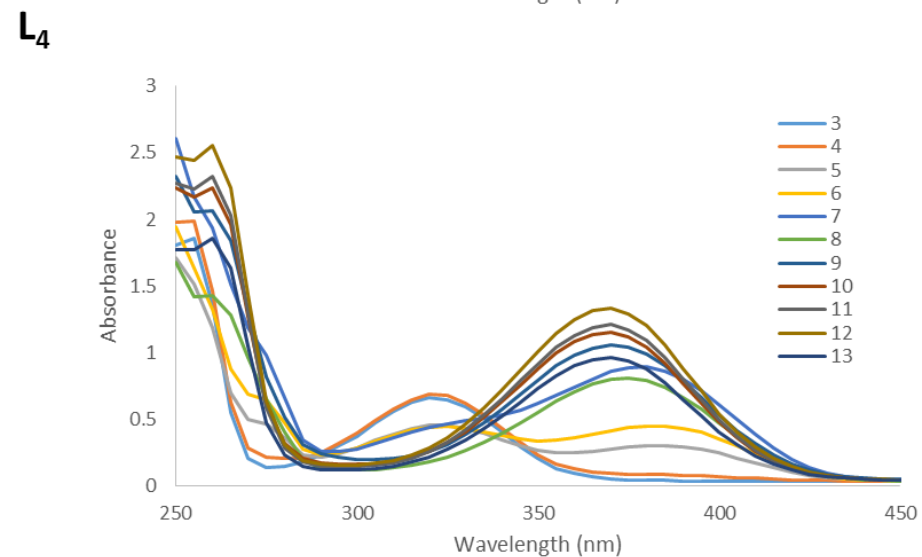

**Figure S9:** Plot of the integrated fluorescence intensity for the emission of  $L_1$ - $L_4$  in the absence (orange bar) and presence (gray, yellow and blue bar) of 1 equivalent of the metal ion against pH.  $L_1$  was excited at 300 nm and read from 350-600 nm;  $L_2$  was excited at 380 nm and read from 420-600 nm;  $L_3$  and  $L_4$  were excited at 375 nm and read from 400-350 nm.

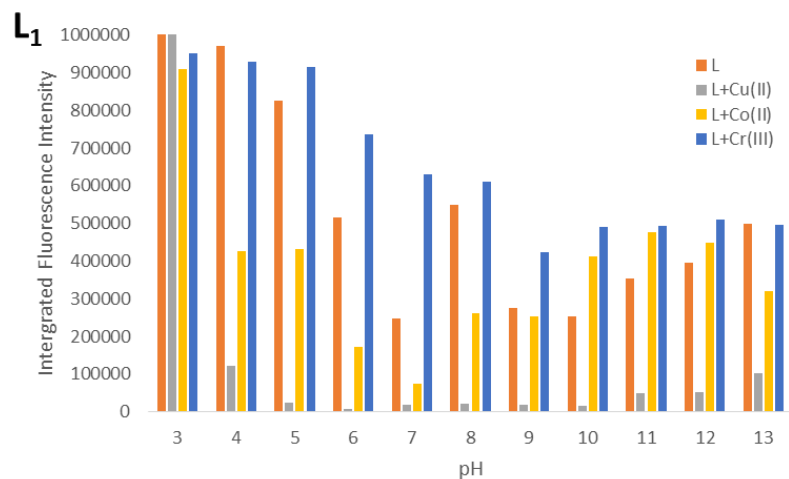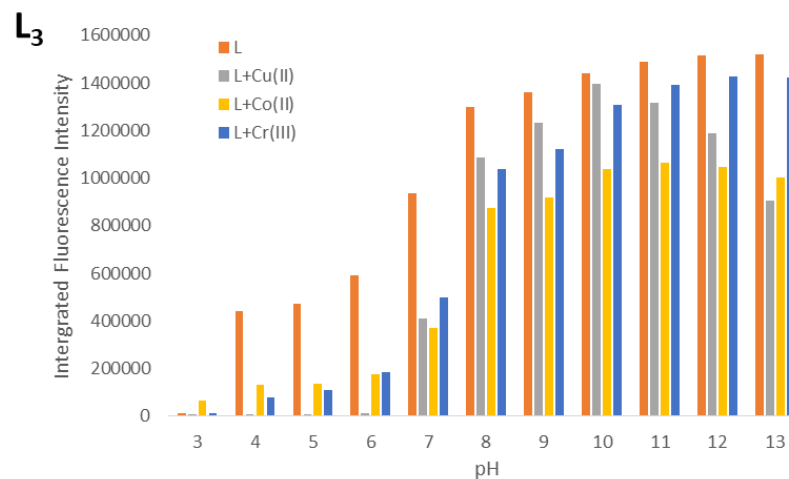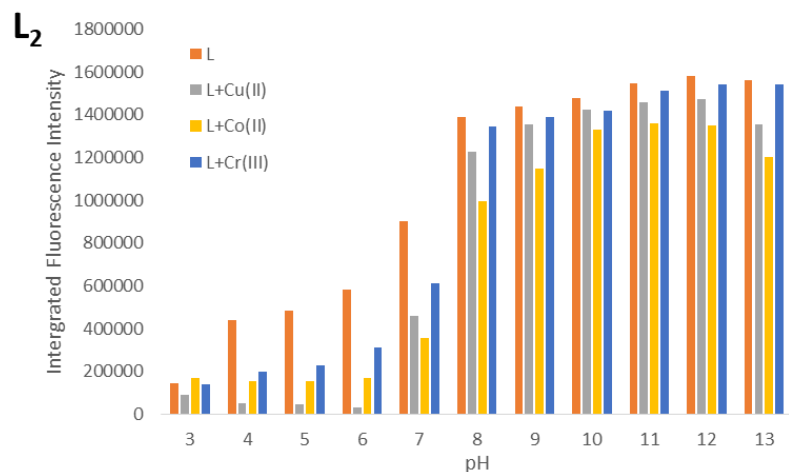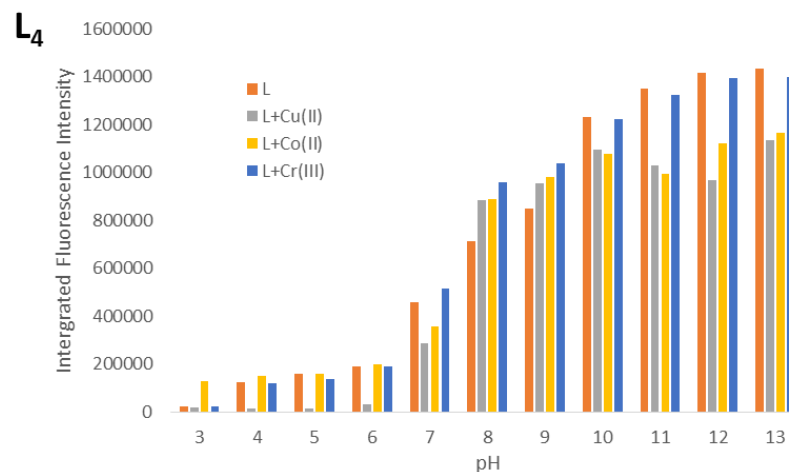

Figure S10: NMRs

NMR Precursor

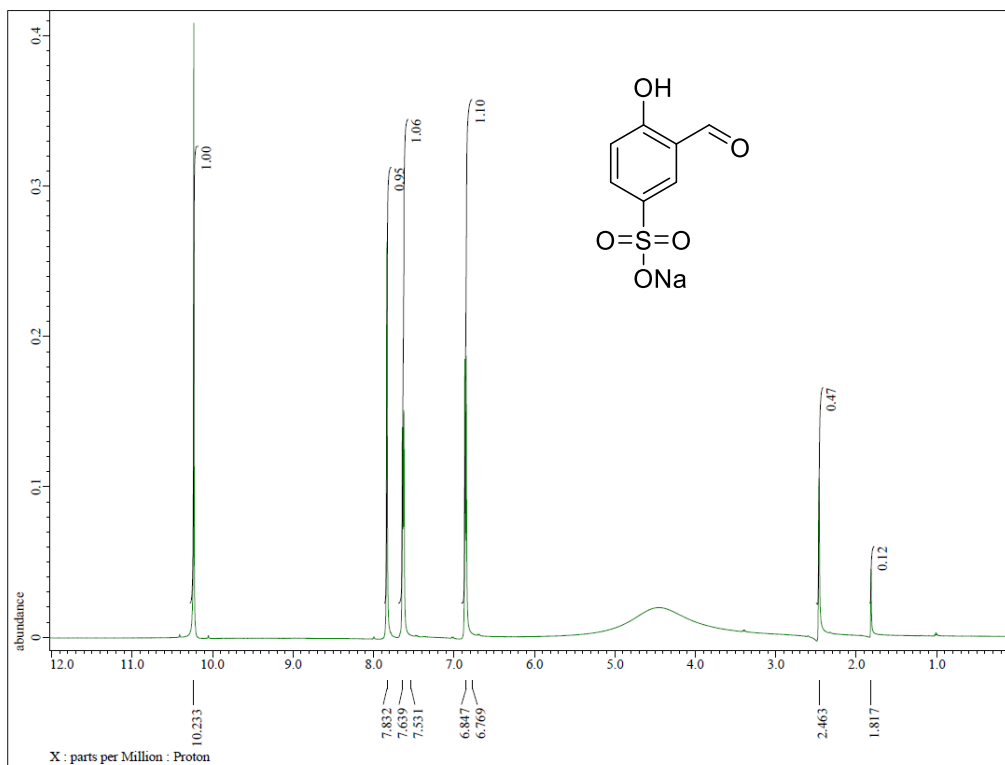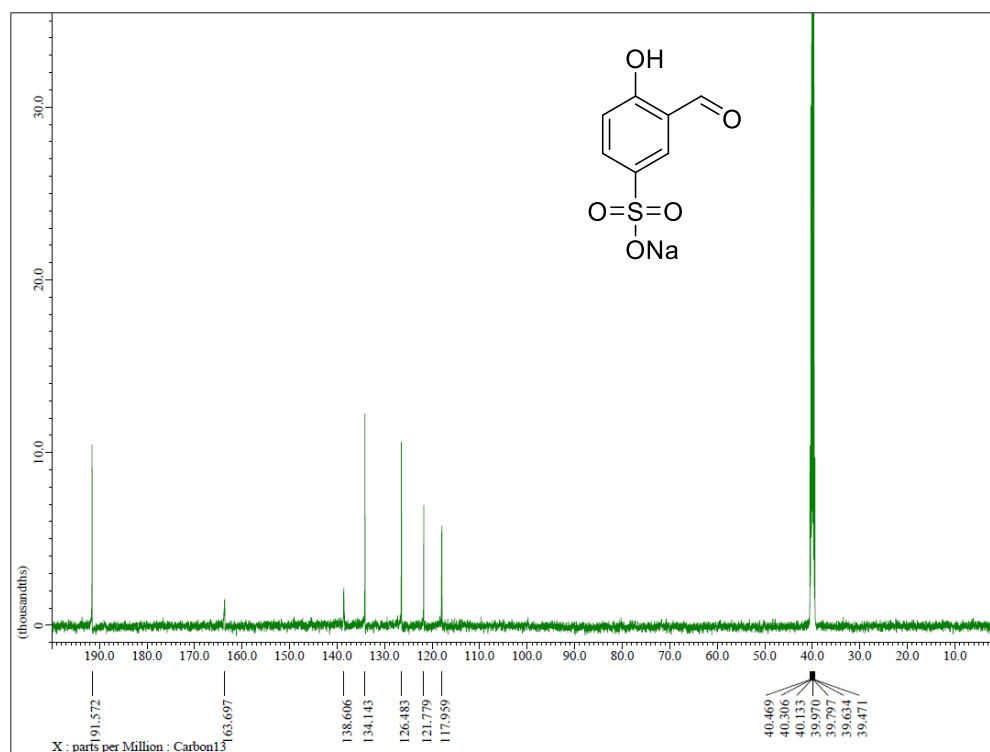

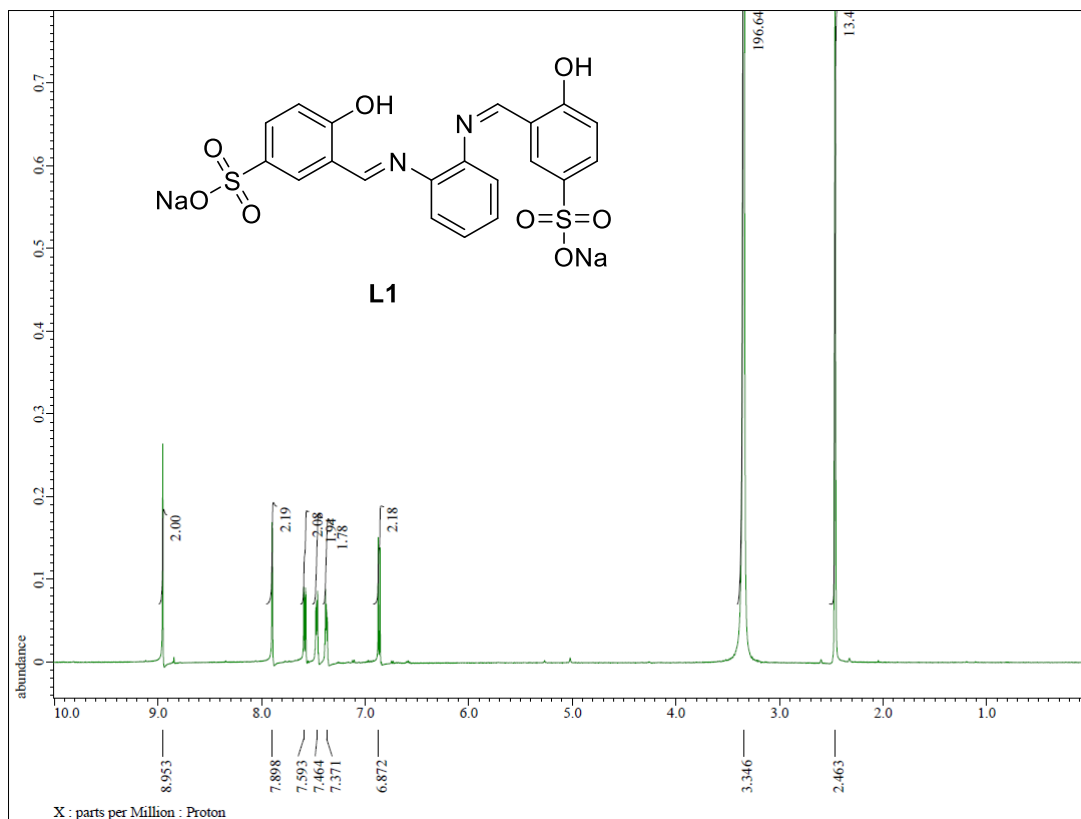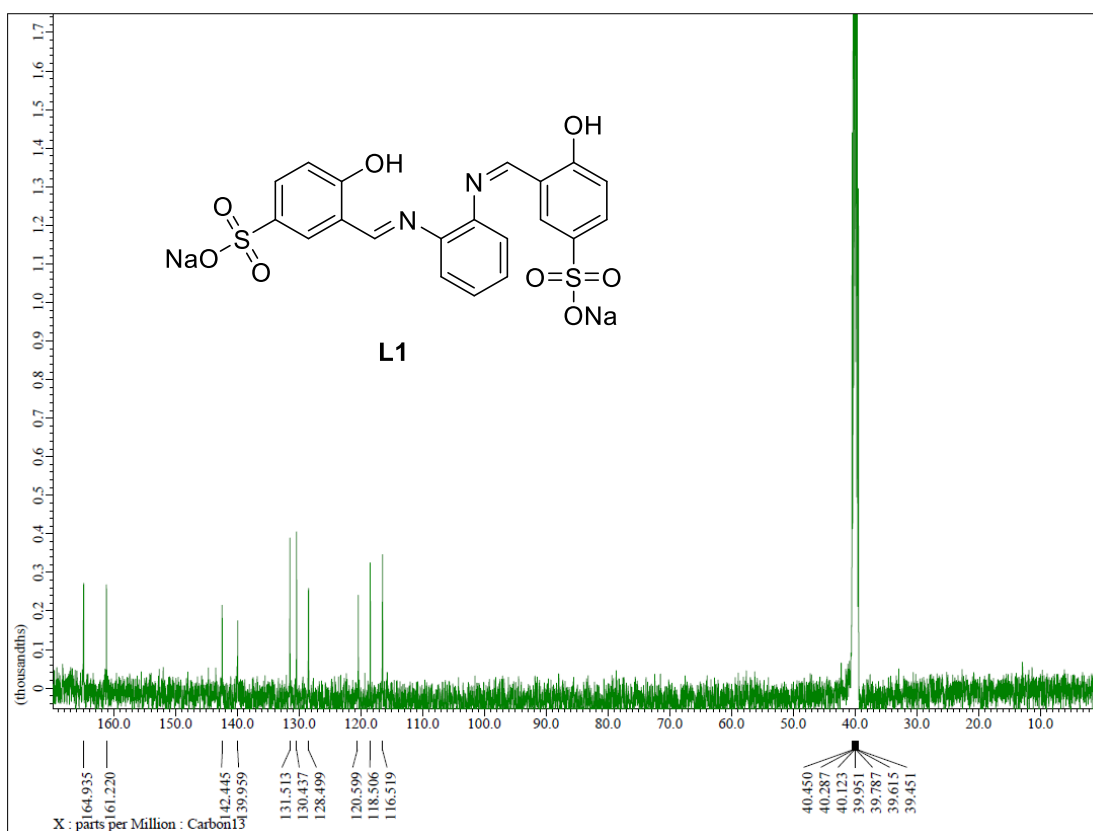

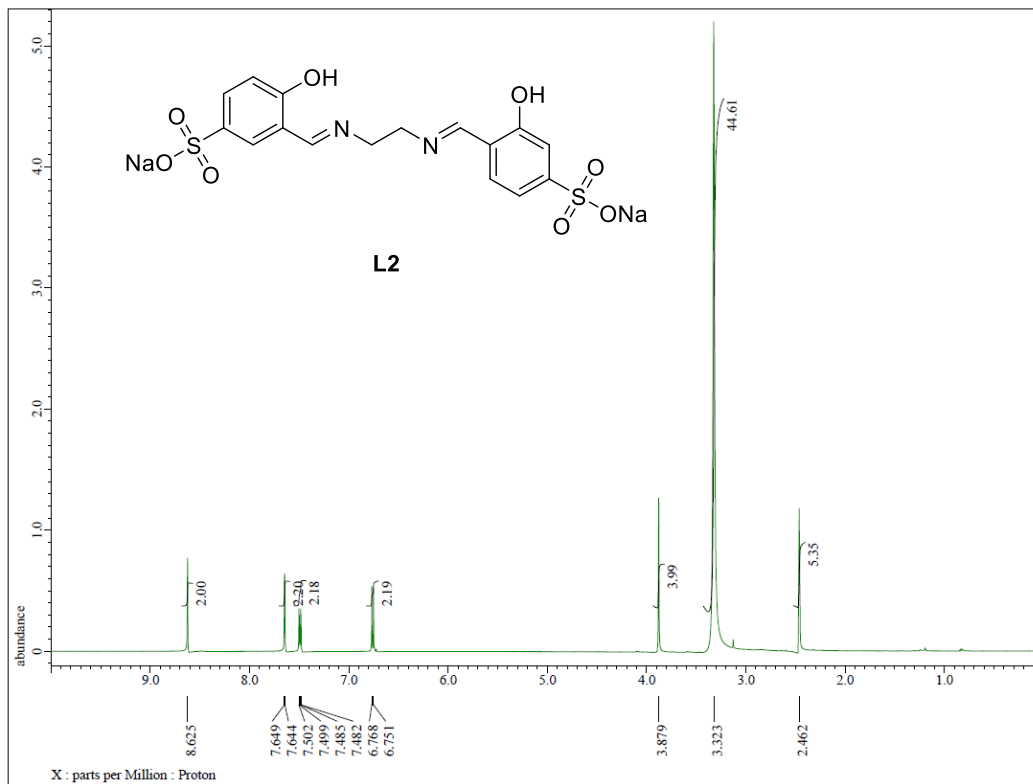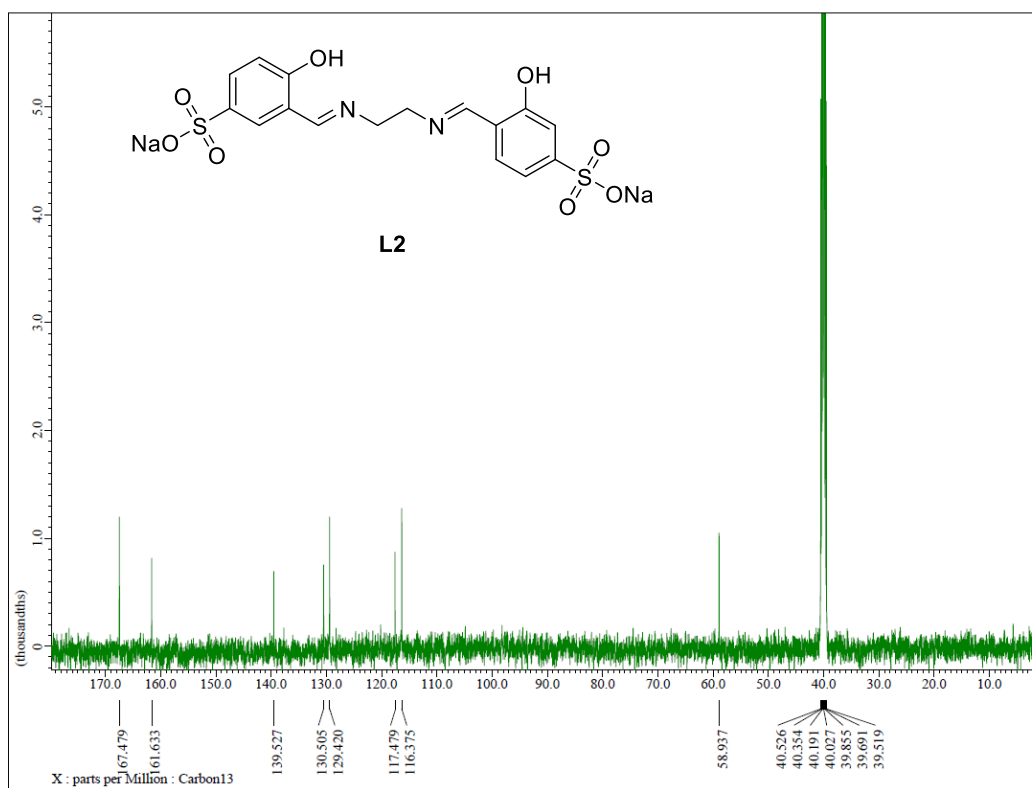

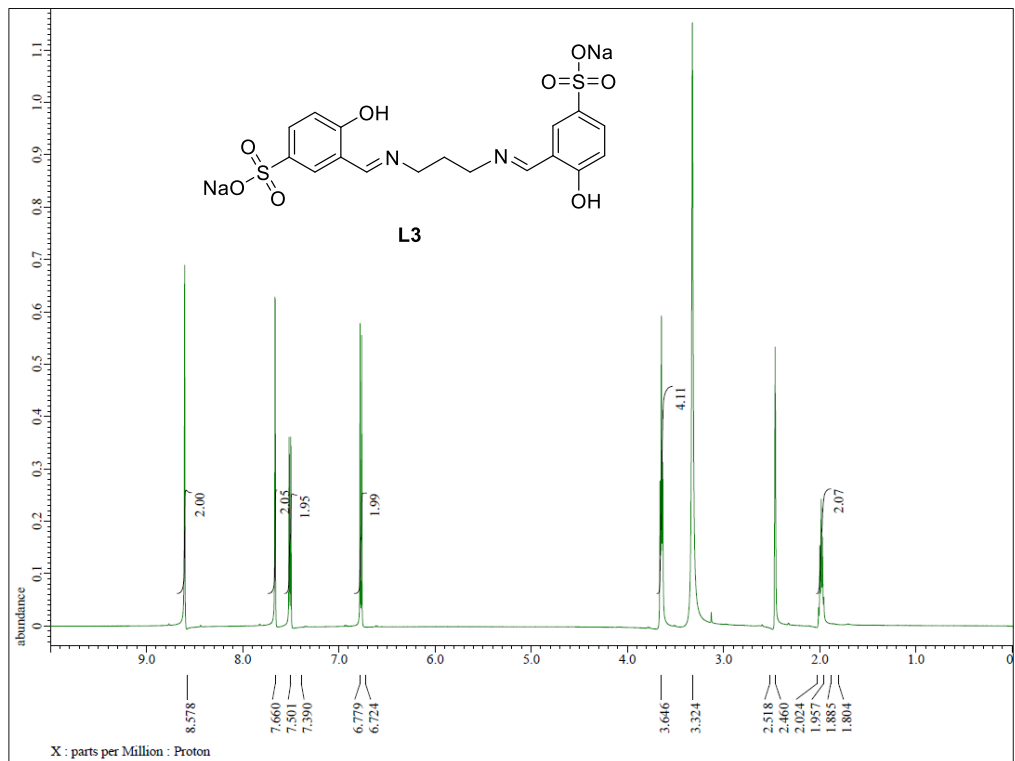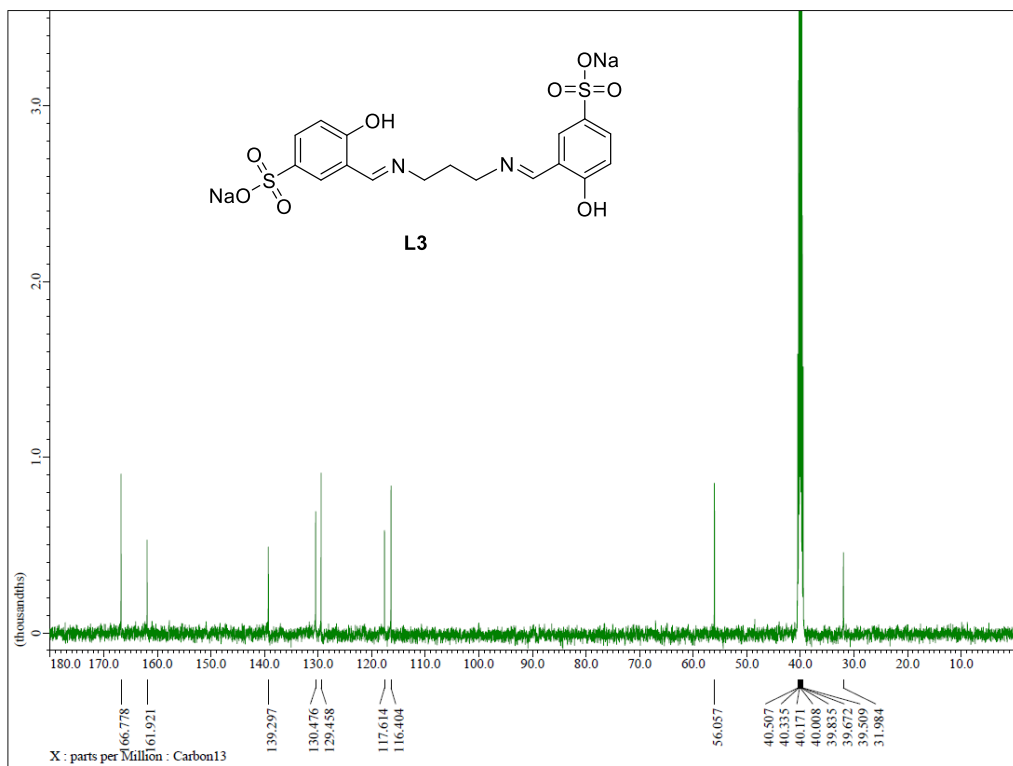



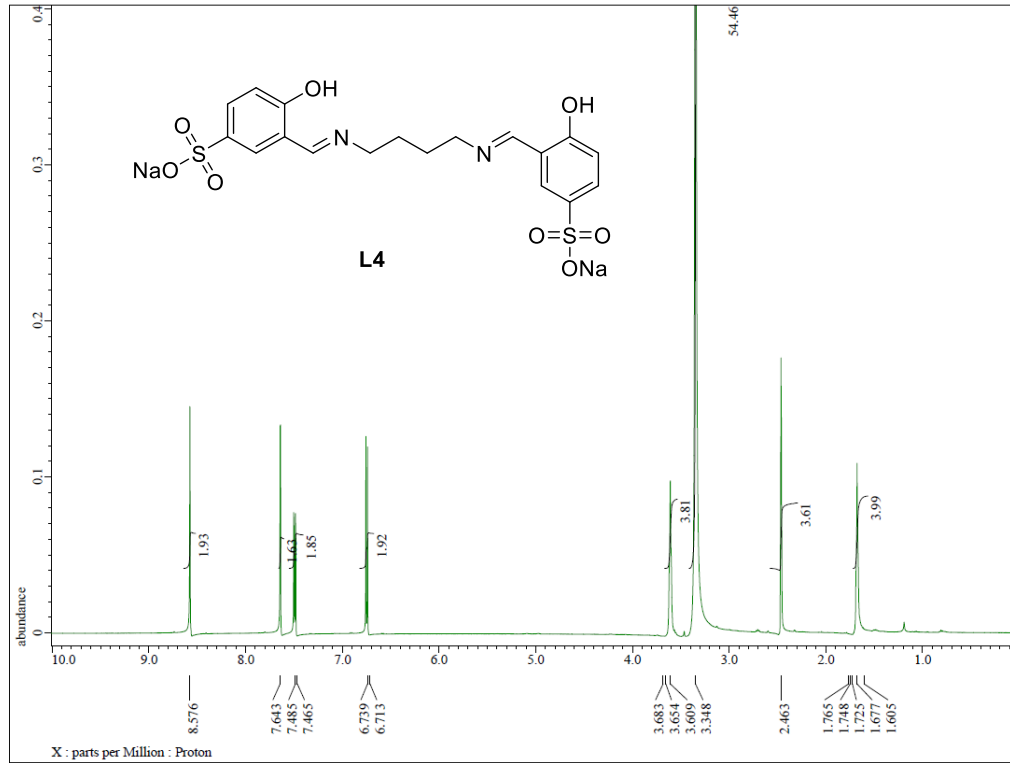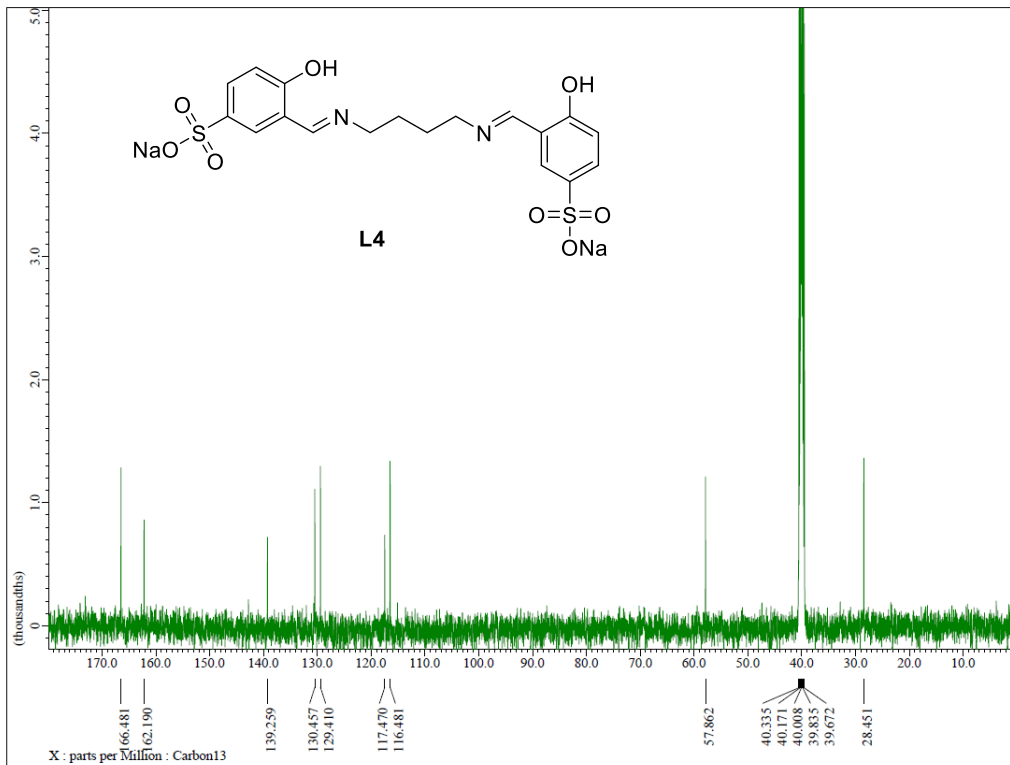

Supplement: ao8b02750_si_001.pdf [file ao8b02750_si_001.pdf]
